# Supplementary material
Source: PubMed Central journal article supplement (PMC5679102)
Supplement: NIHMS914659-supplement-Supporeting_Information.pdf [file NIHMS914659-supplement-Supporeting_Information.pdf]

## SUPPORTING INFORMATION

### **Antimalarial Potential of Neolignans and other Compounds from *Magnolia grandiflora* (Magnoliaceae)**

Abdul Latif,<sup>a,b</sup> Yongle Du,<sup>a</sup> Seema R. Dalal,<sup>c</sup> Maria L. Fernández-Murga,<sup>c</sup> Emilio F. Merino,<sup>c,d</sup>  
Maria B. Cassera,<sup>c,d</sup> Michael Goetz,<sup>e</sup> David G. I. Kingston<sup>\*,a</sup>

<sup>a</sup>Department of Chemistry and Virginia Tech Center for Drug Discovery, M/C 0212, Virginia Tech, Blacksburg, VA 24061, United States, e-mail: dkingston@vt.edu

<sup>b</sup>Present address: Department of Chemistry, University of Malakand, Chakdara, Dir (Lower), Khyber Pakhtunkhwa, 18800, Pakistan

<sup>c</sup>Department of Biochemistry and Virginia Tech Center for Drug Discovery, M/C 0308, Virginia Tech, Blacksburg, VA 24061, United States

<sup>d</sup>Present address: Department of Biochemistry & Molecular Biology, University of Georgia, Athens, GA 30602, United States.

<sup>e</sup>Natural Products Discovery Institute, 3805 Old Easton Road, Doylestown, PA, 18902, United States

#### AUTHOR INFORMATION:

\*Corresponding author. Tel.: +1 540 231 6570; fax: +1 540 231 3255. E-mail address: dkingston@vt.edu (D.G.I. Kingston).

## **List of supporting information**

**Figure-S1:**  $^1\text{H}$ -NMR spectrum (500 MHz,  $\text{CDCl}_3$ ) of compound **1**

**Figure-S2:**  $^{13}\text{C}$ -NMR spectrum (125 MHz,  $\text{CDCl}_3$ ) of compound **1**

**Figure-S3:** 1H-1H-COSY spectrum of compounds **1**

**Figure-S4:**  $^1\text{H}$ - $^{13}\text{C}$ -HSQC NMR spectrum of compound **1**

**Figure-S5:**  $^1\text{H}$ - $^{13}\text{C}$ -HMBC NMR spectrum of compound **1**

**Figure-S6:** HR-ESIMS spectrum of compound **1**

**Figure-S7:**  $^1\text{H}$ -NMR spectrum (500 MHz,  $\text{CDCl}_3$ ) of compound **2**

**Figure-S8:**  $^{13}\text{C}$ -NMR spectrum (125 MHz,  $\text{CDCl}_3$ ) of compound **2**

**Figure-S9:**  $^1\text{H}$ - $^{13}\text{C}$ -HSQC NMR spectrum of compound **2**

**Figure-S10:**  $^1\text{H}$ - $^{13}\text{C}$ -HMBC NMR spectrum of compound **2**

**Figure-S11:** HR-ESIMS spectrum of compound **2** in negative mode

**Figure-S12:** HR-ESIMS spectrum of compound **2** in positive mode

**Figure-S13:**  $^1\text{H}$ -NMR spectrum (500 MHz,  $\text{CDCl}_3$ ) of compound **3**

**Figure-S14:**  $^1\text{H}$ -NMR spectrum (500 MHz,  $\text{CDCl}_3$ ) of compound **4**

**Figure-S15:**  $^1\text{H}$ -NMR spectrum (500 MHz,  $\text{CDCl}_3$ ) of compound **5**

**Figure-S16:**  $^1\text{H}$ -NMR spectrum (500 MHz,  $\text{CDCl}_3$ ) of compound **6**

**Figure-S17:**  $^1\text{H}$ -NMR spectrum (500 MHz,  $\text{CDCl}_3$ ) of compound **7**

**Figure-S18:**  $^1\text{H}$ -NMR spectrum (500 MHz,  $\text{CDCl}_3$ ) of compound **8**

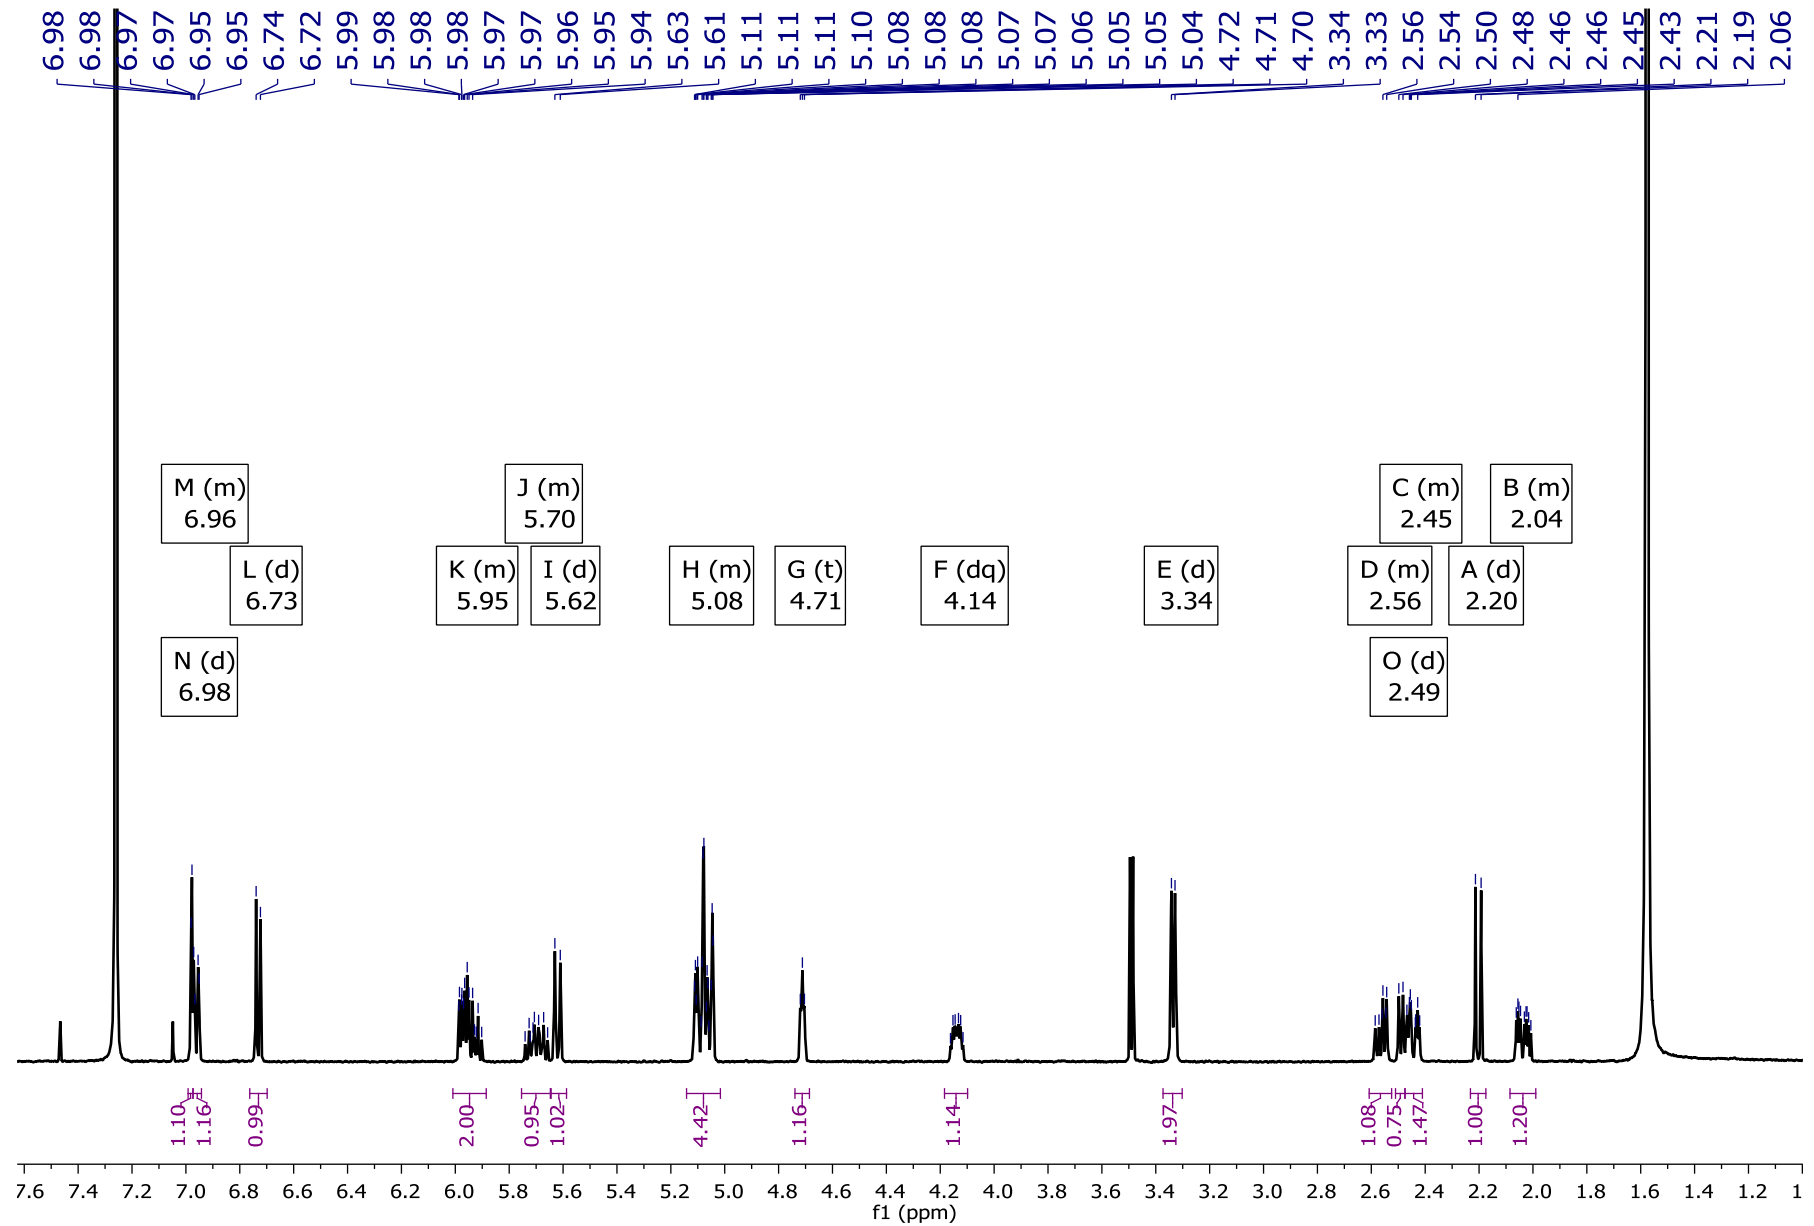

**Figure-S1:** <sup>1</sup>H-NMR spectrum (500 MHz, CDCl<sub>3</sub>) of compound **1**

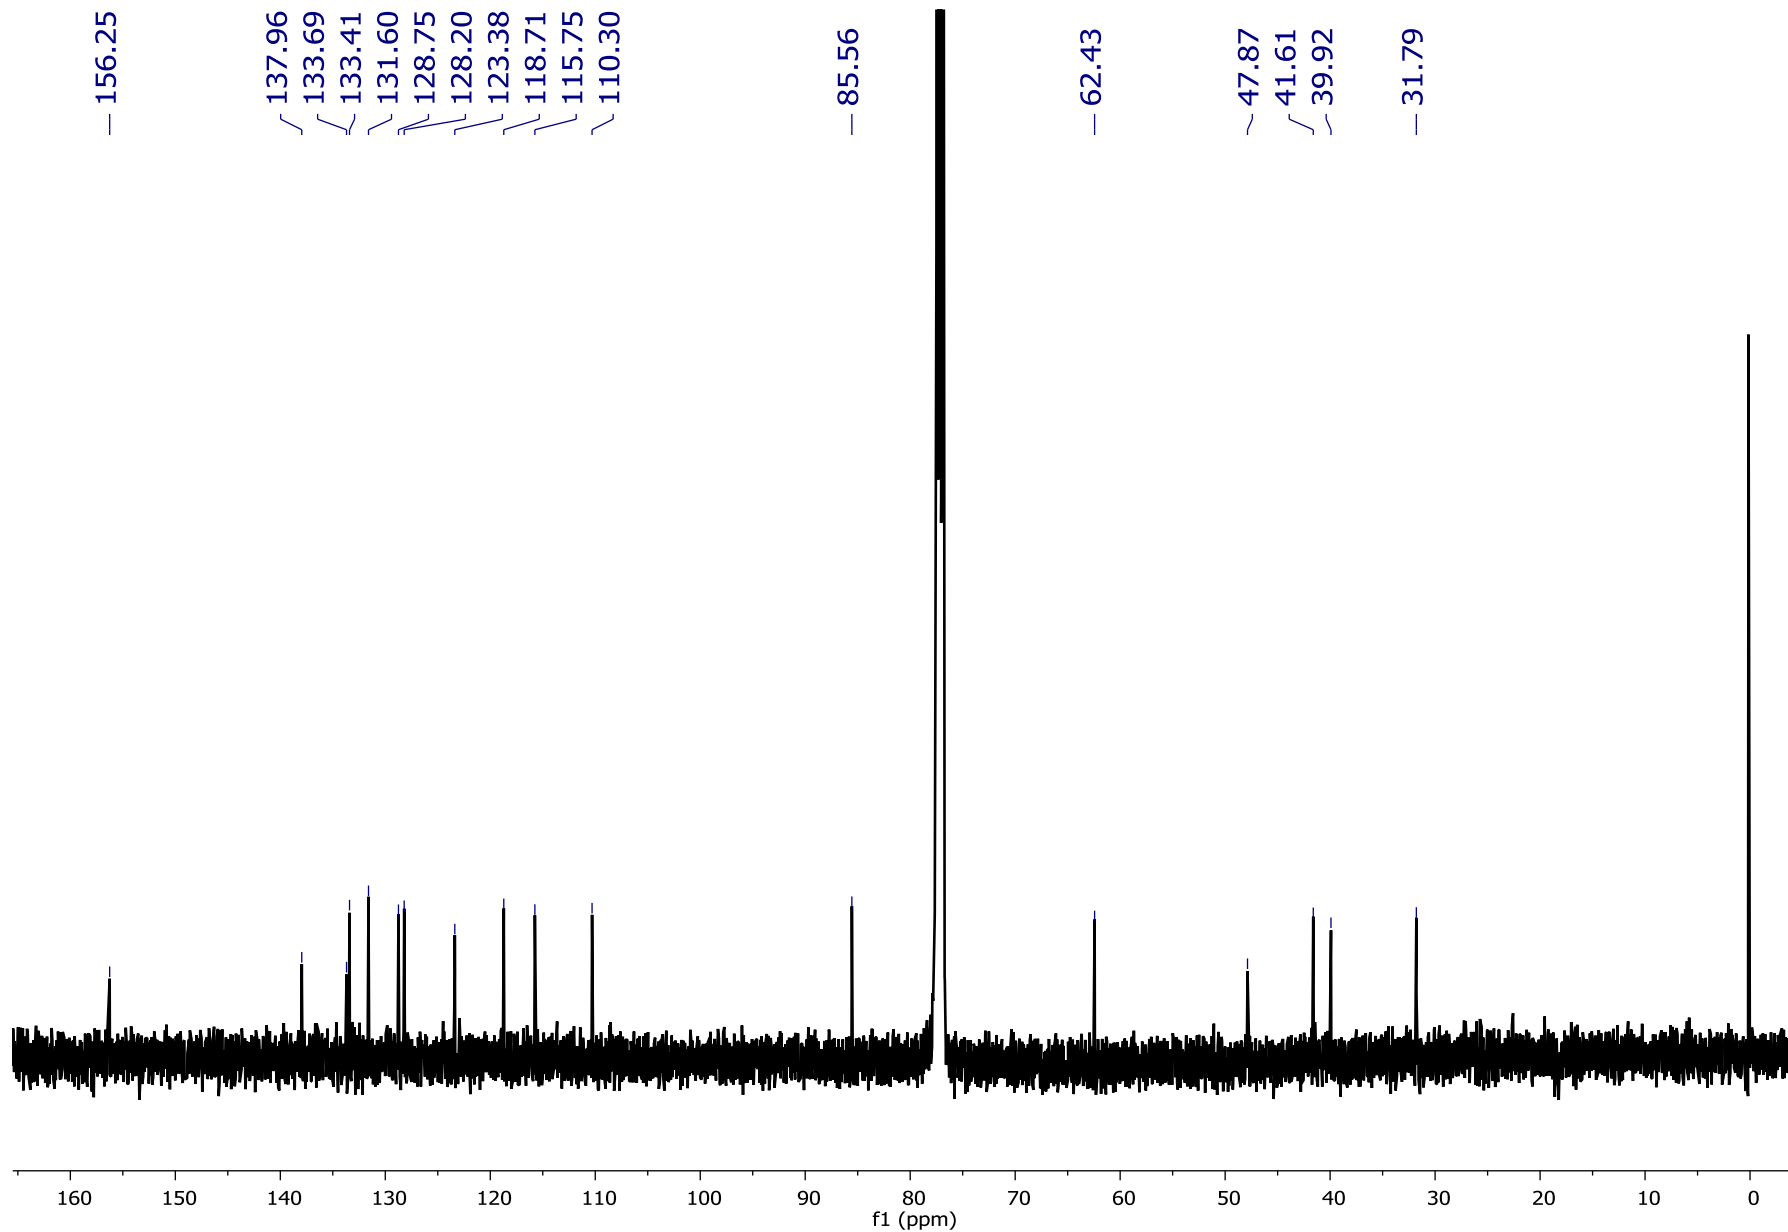

**Figure-S2:**  $^{13}\text{C}$ -NMR spectrum (125 MHz,  $\text{CDCl}_3$ ) of compound **1**

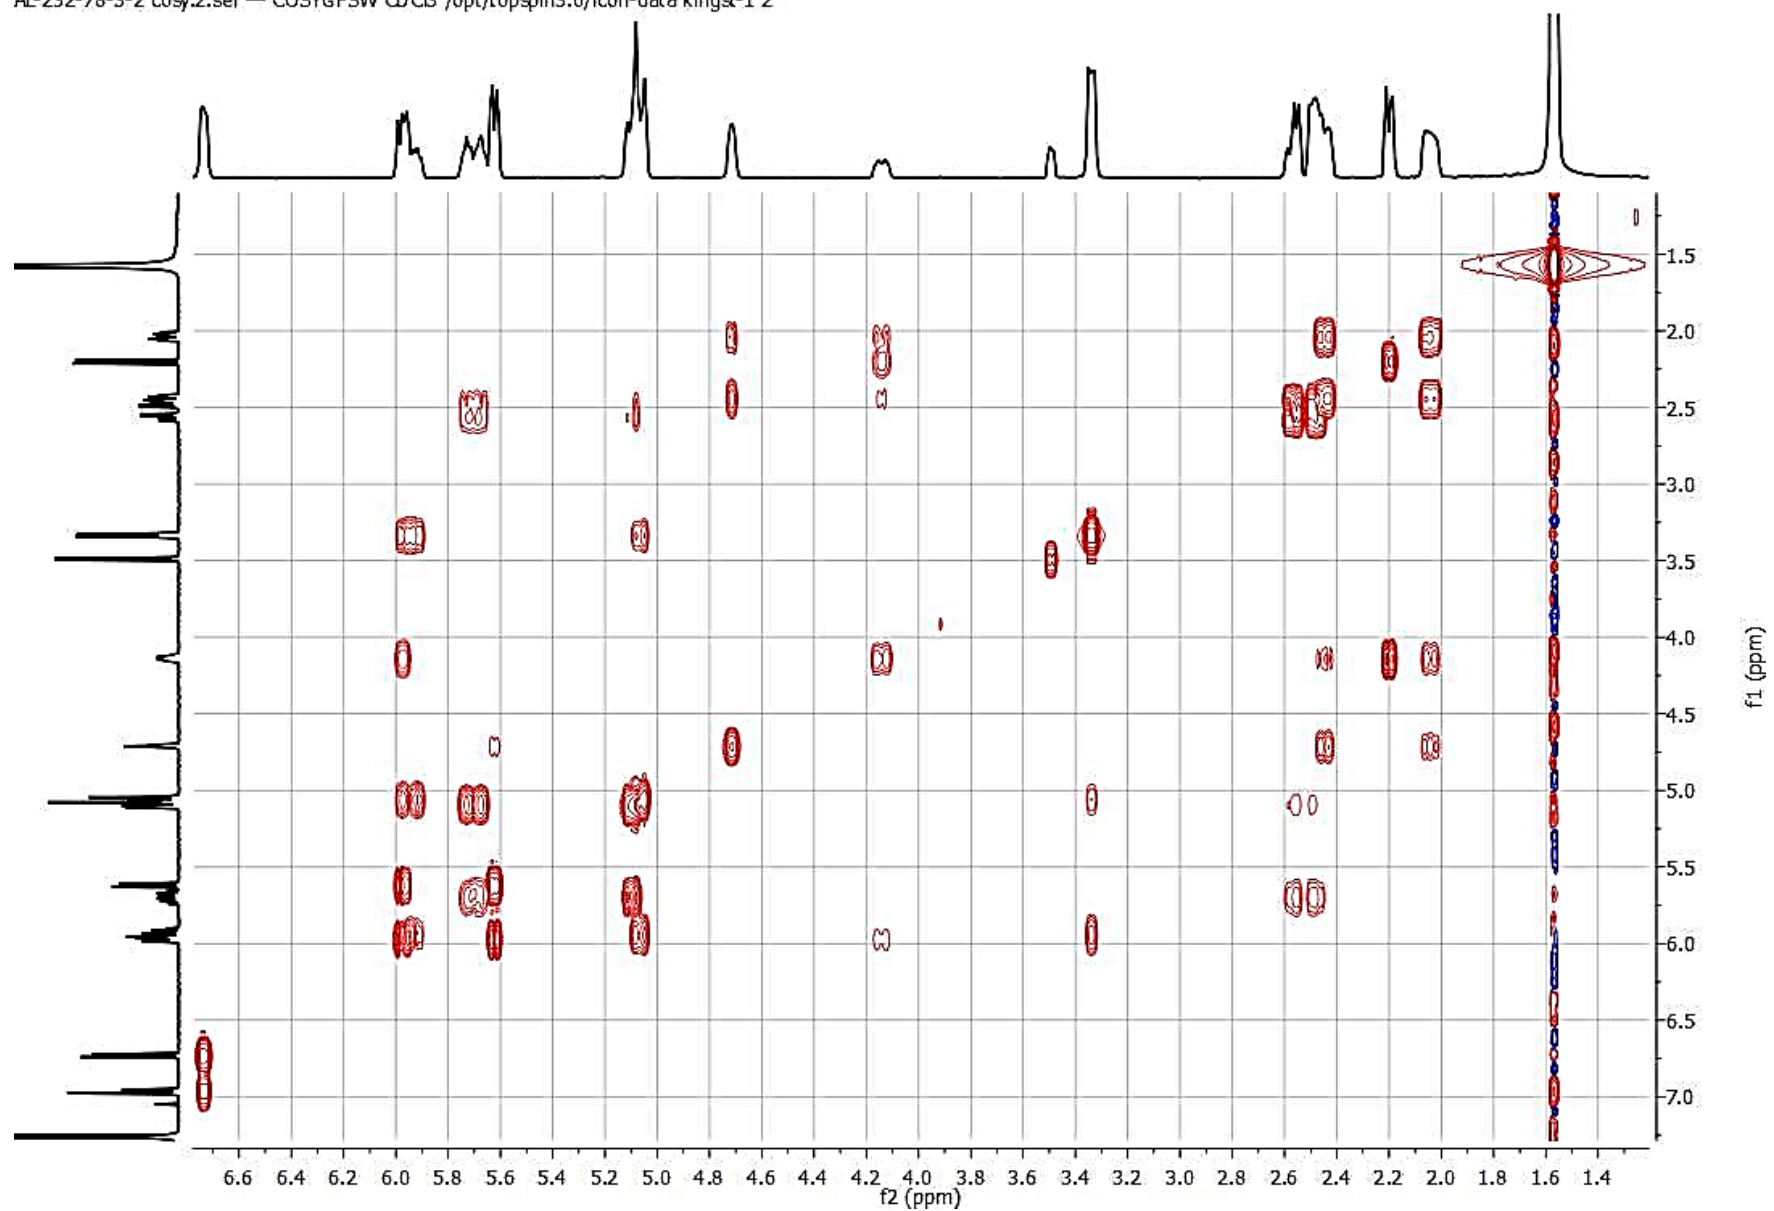

**Figure-S3:**  $^1\text{H}$ - $^1\text{H}$ -COSY spectrum of compounds 1

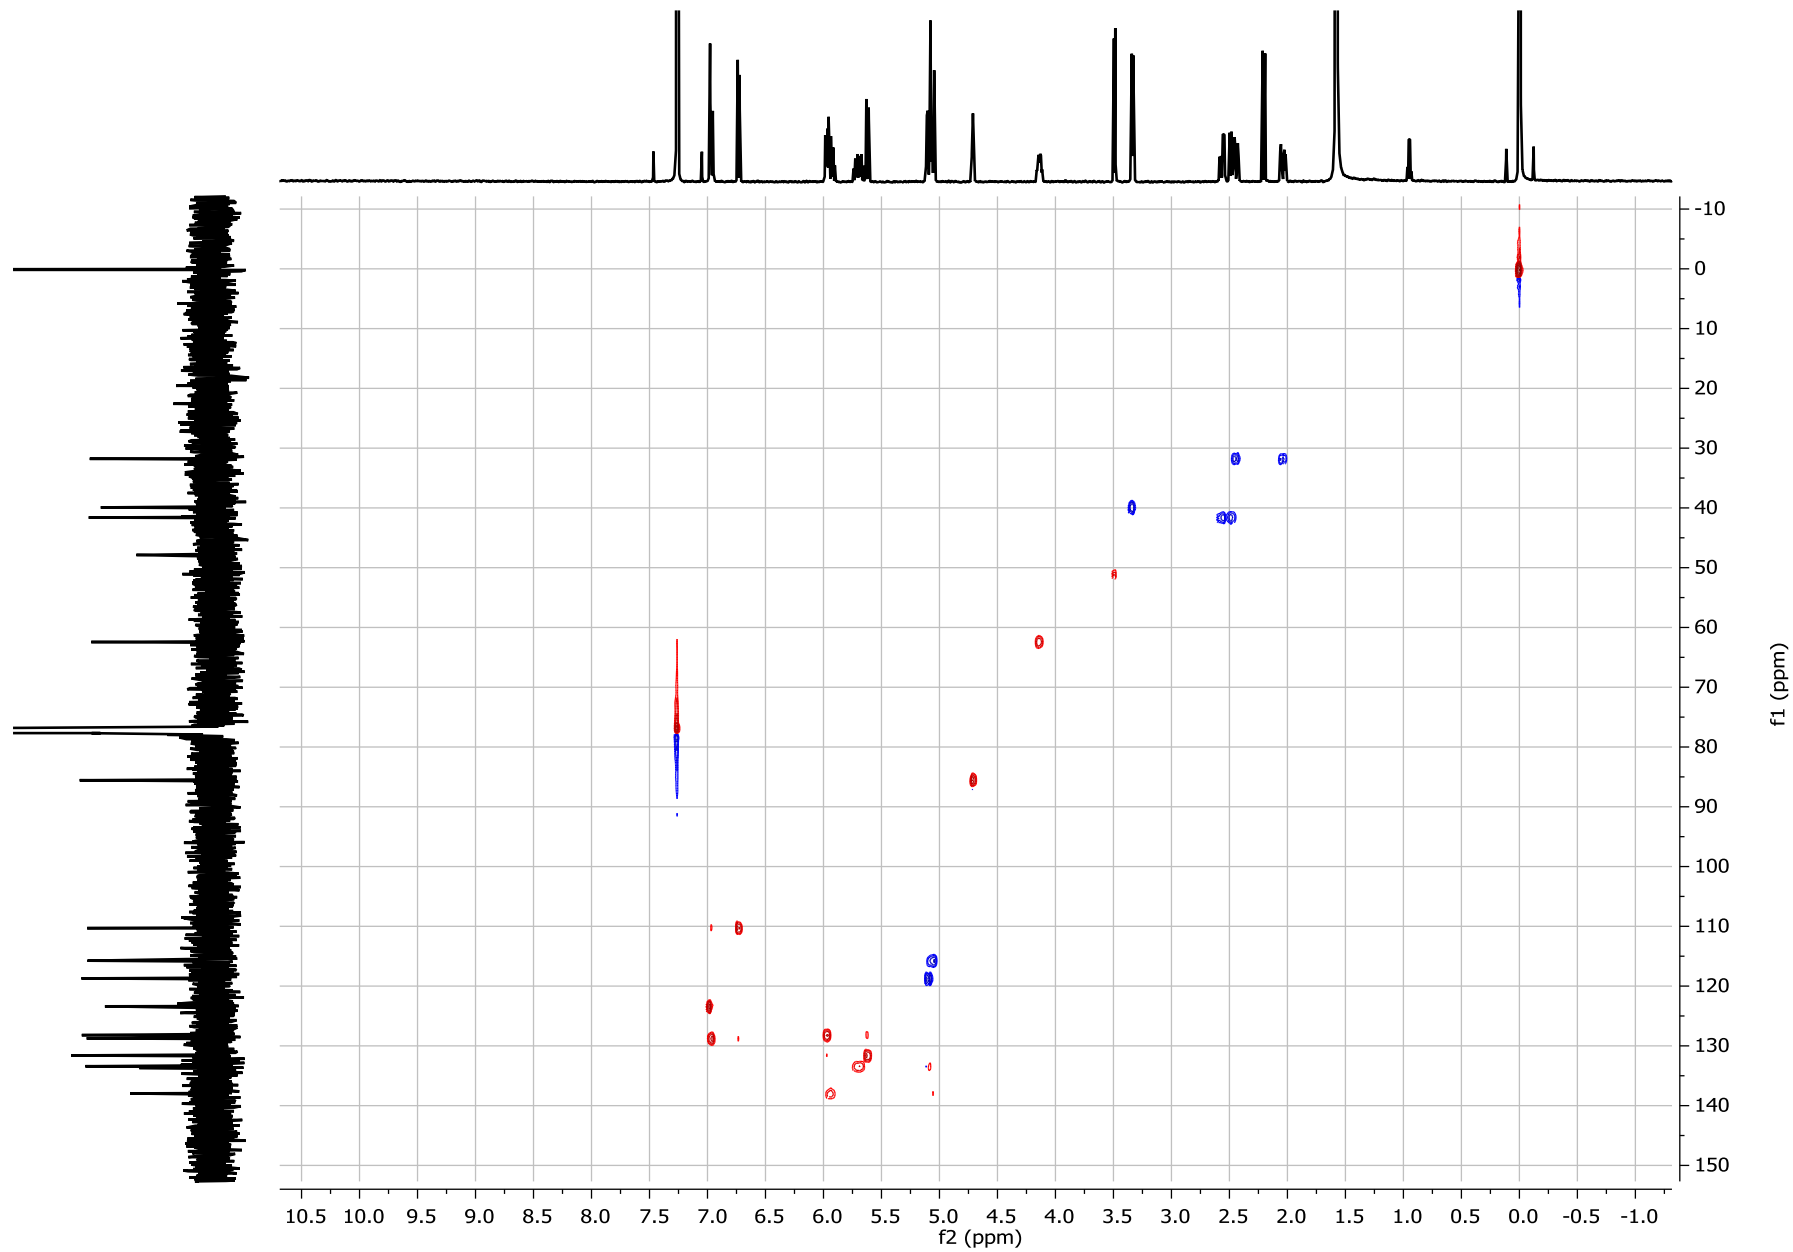

**Figure-S4:**  $^1\text{H}$ - $^{13}\text{C}$ -HSQC NMR spectrum of compound **1**

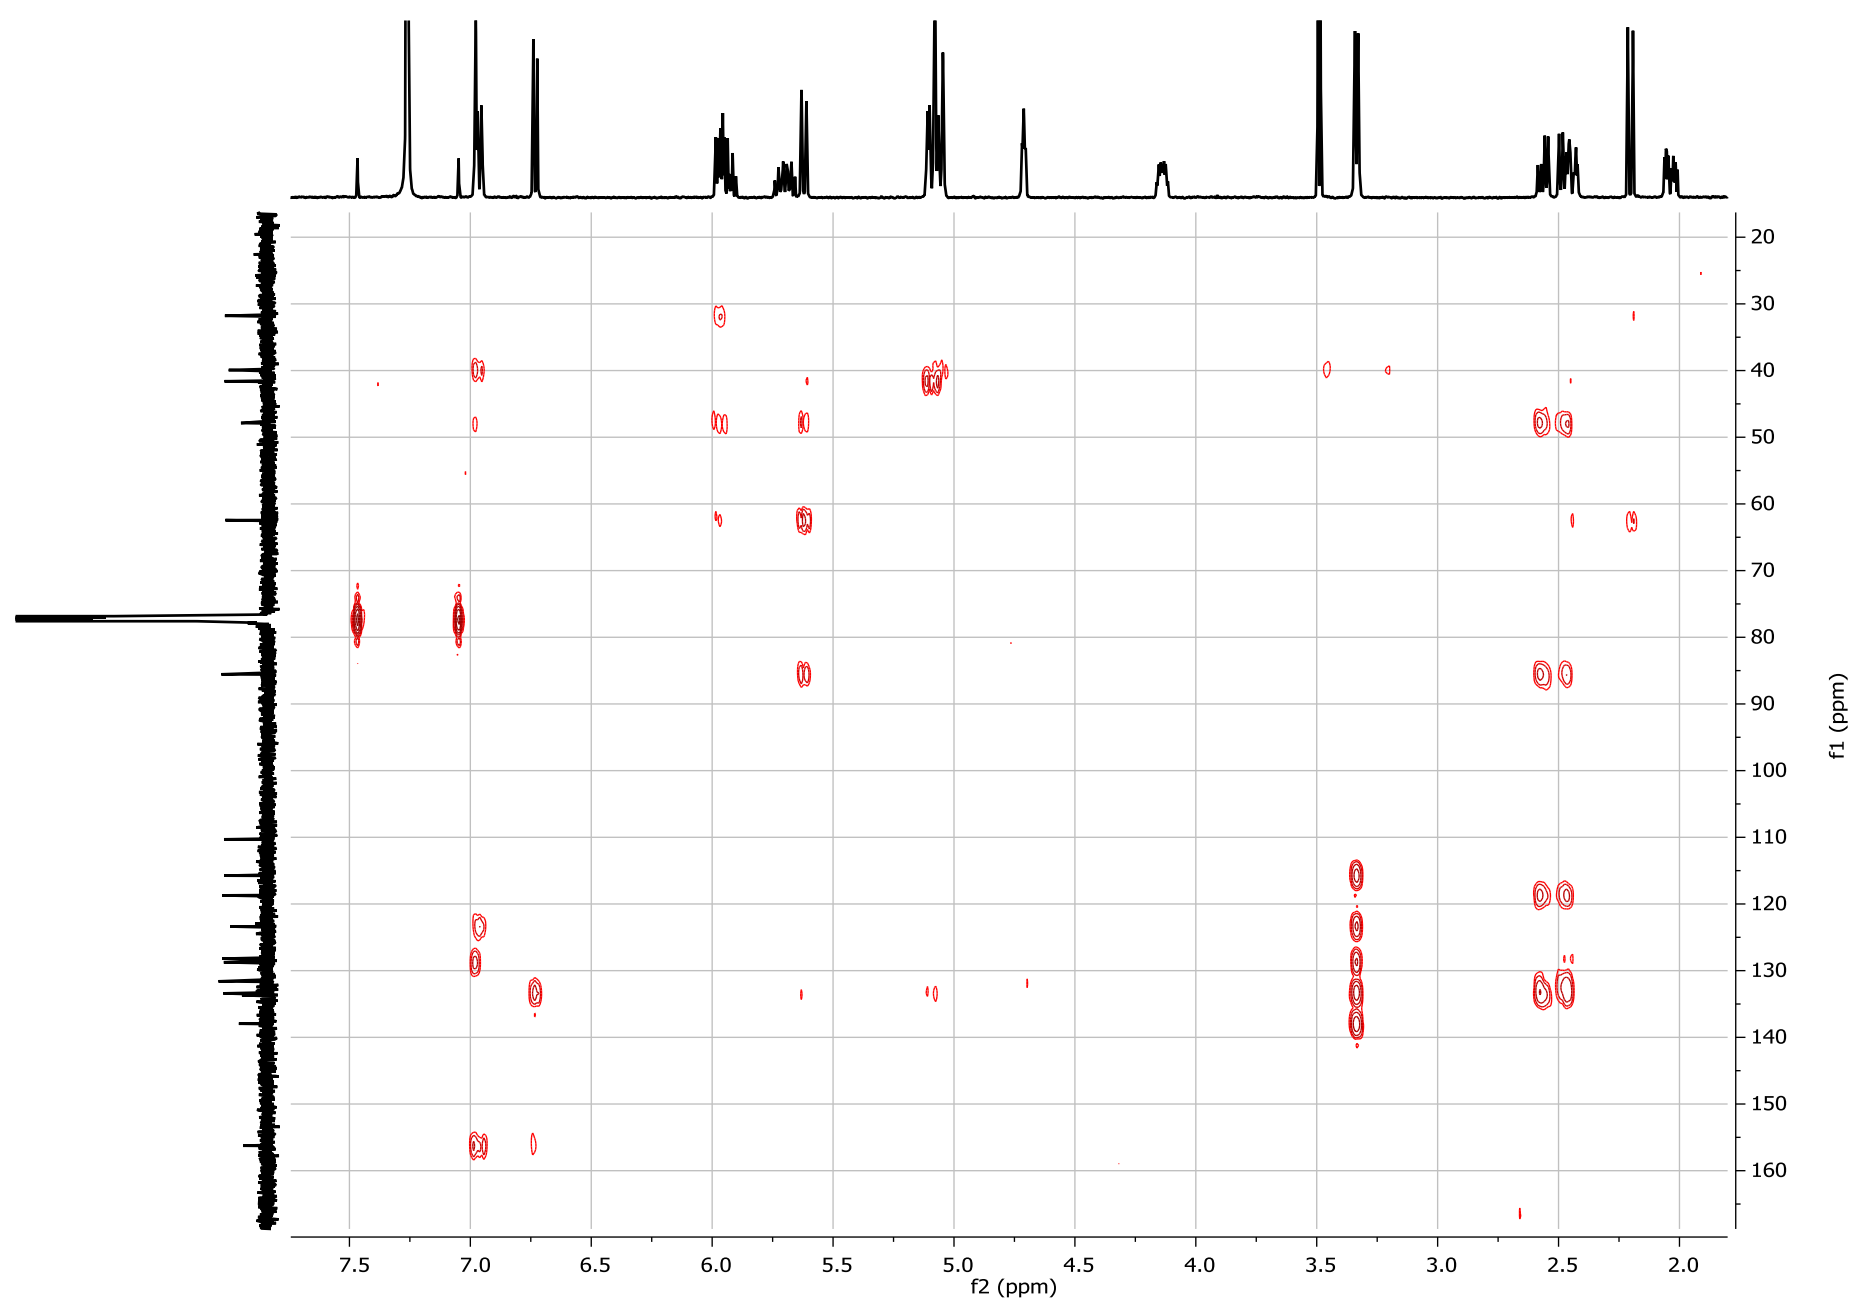

**Figure-S5:**  $^1\text{H}$ - $^{13}\text{C}$ -HMBC NMR spectrum of compound **1**

|               |                      |             |                  |                 |              |                        |                     |
|---------------|----------------------|-------------|------------------|-----------------|--------------|------------------------|---------------------|
| Sample Name   | AL-7832-new          | Position    | P1-C4            | Instrument Name | Instrument 1 | User Name              |                     |
| Inj Vol       | 2                    | InjPosition |                  | SampleType      | Sample       | IRM Calibration Status | Success             |
| Data Filename | AL-7832-new_esipos_u | ACQ Method  | Dual_esl_union.m | Comment         | 431820       | Acquired Time          | 7/6/2016 9:50:50 AM |

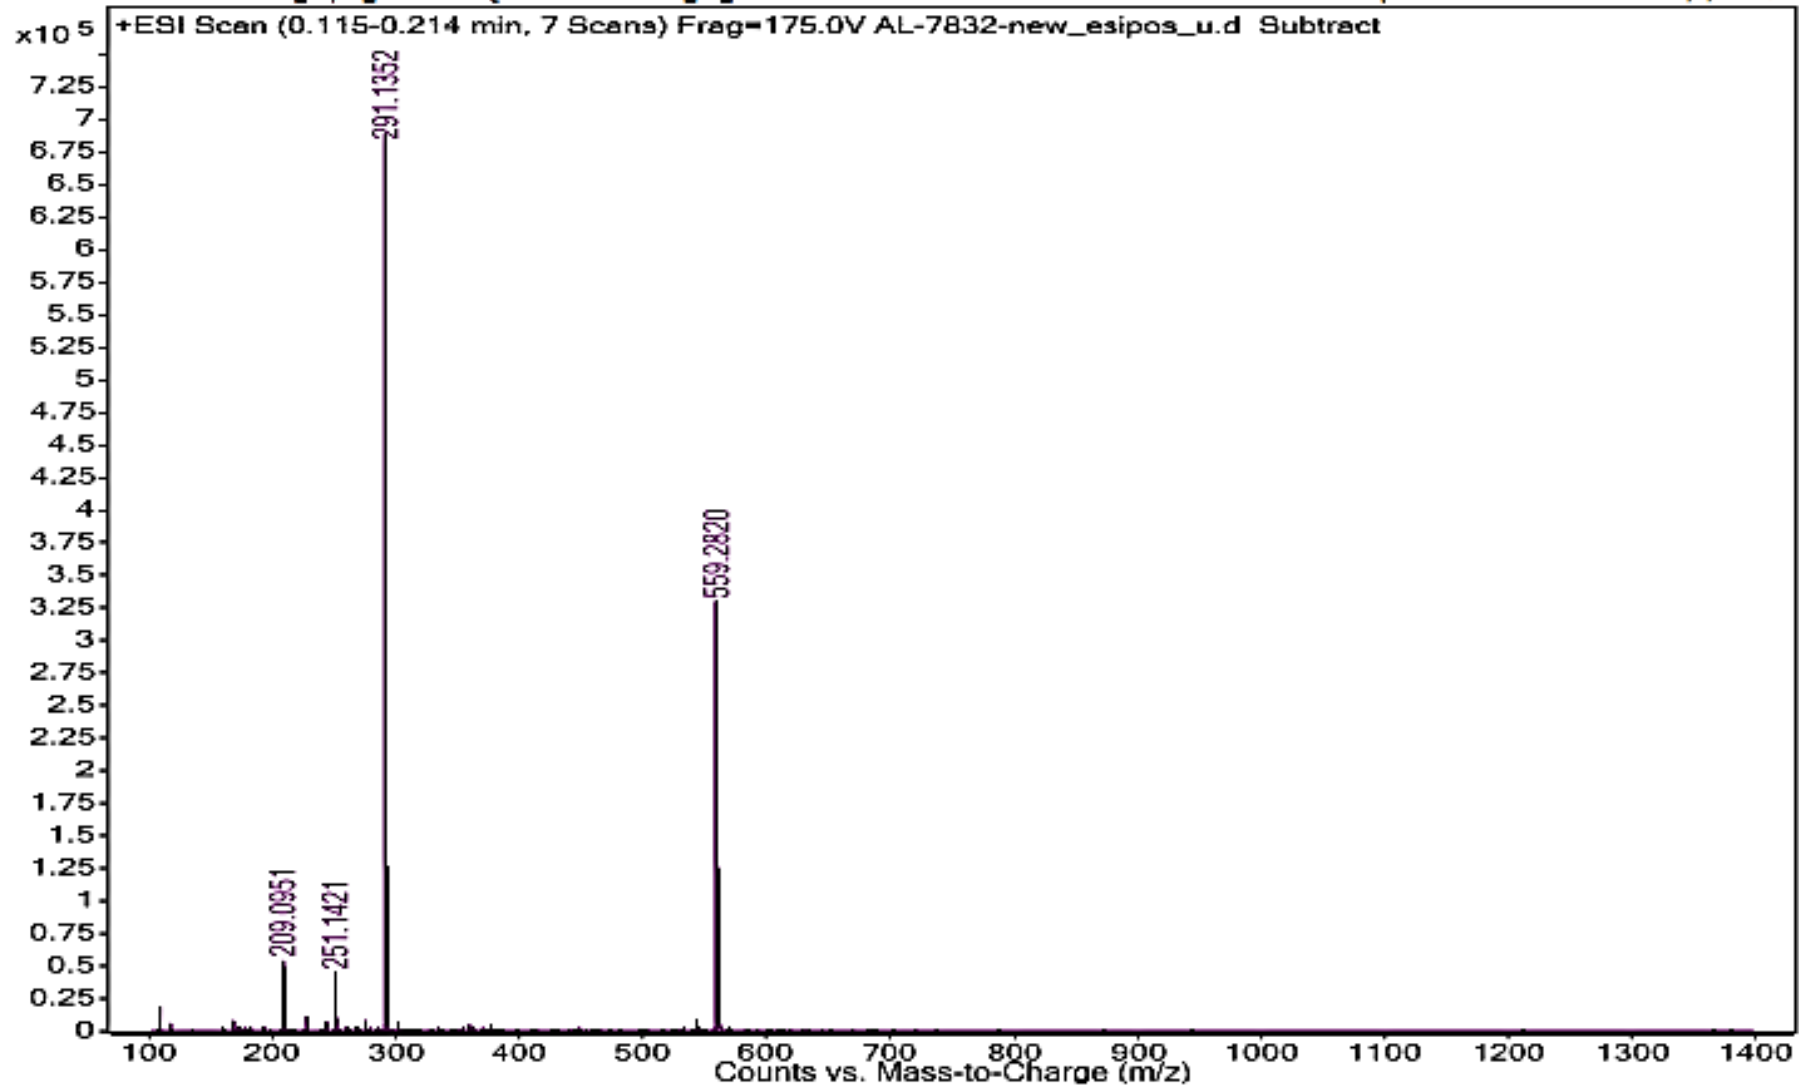

Figure-S6: HR-ESIMS spectrum of compound 1



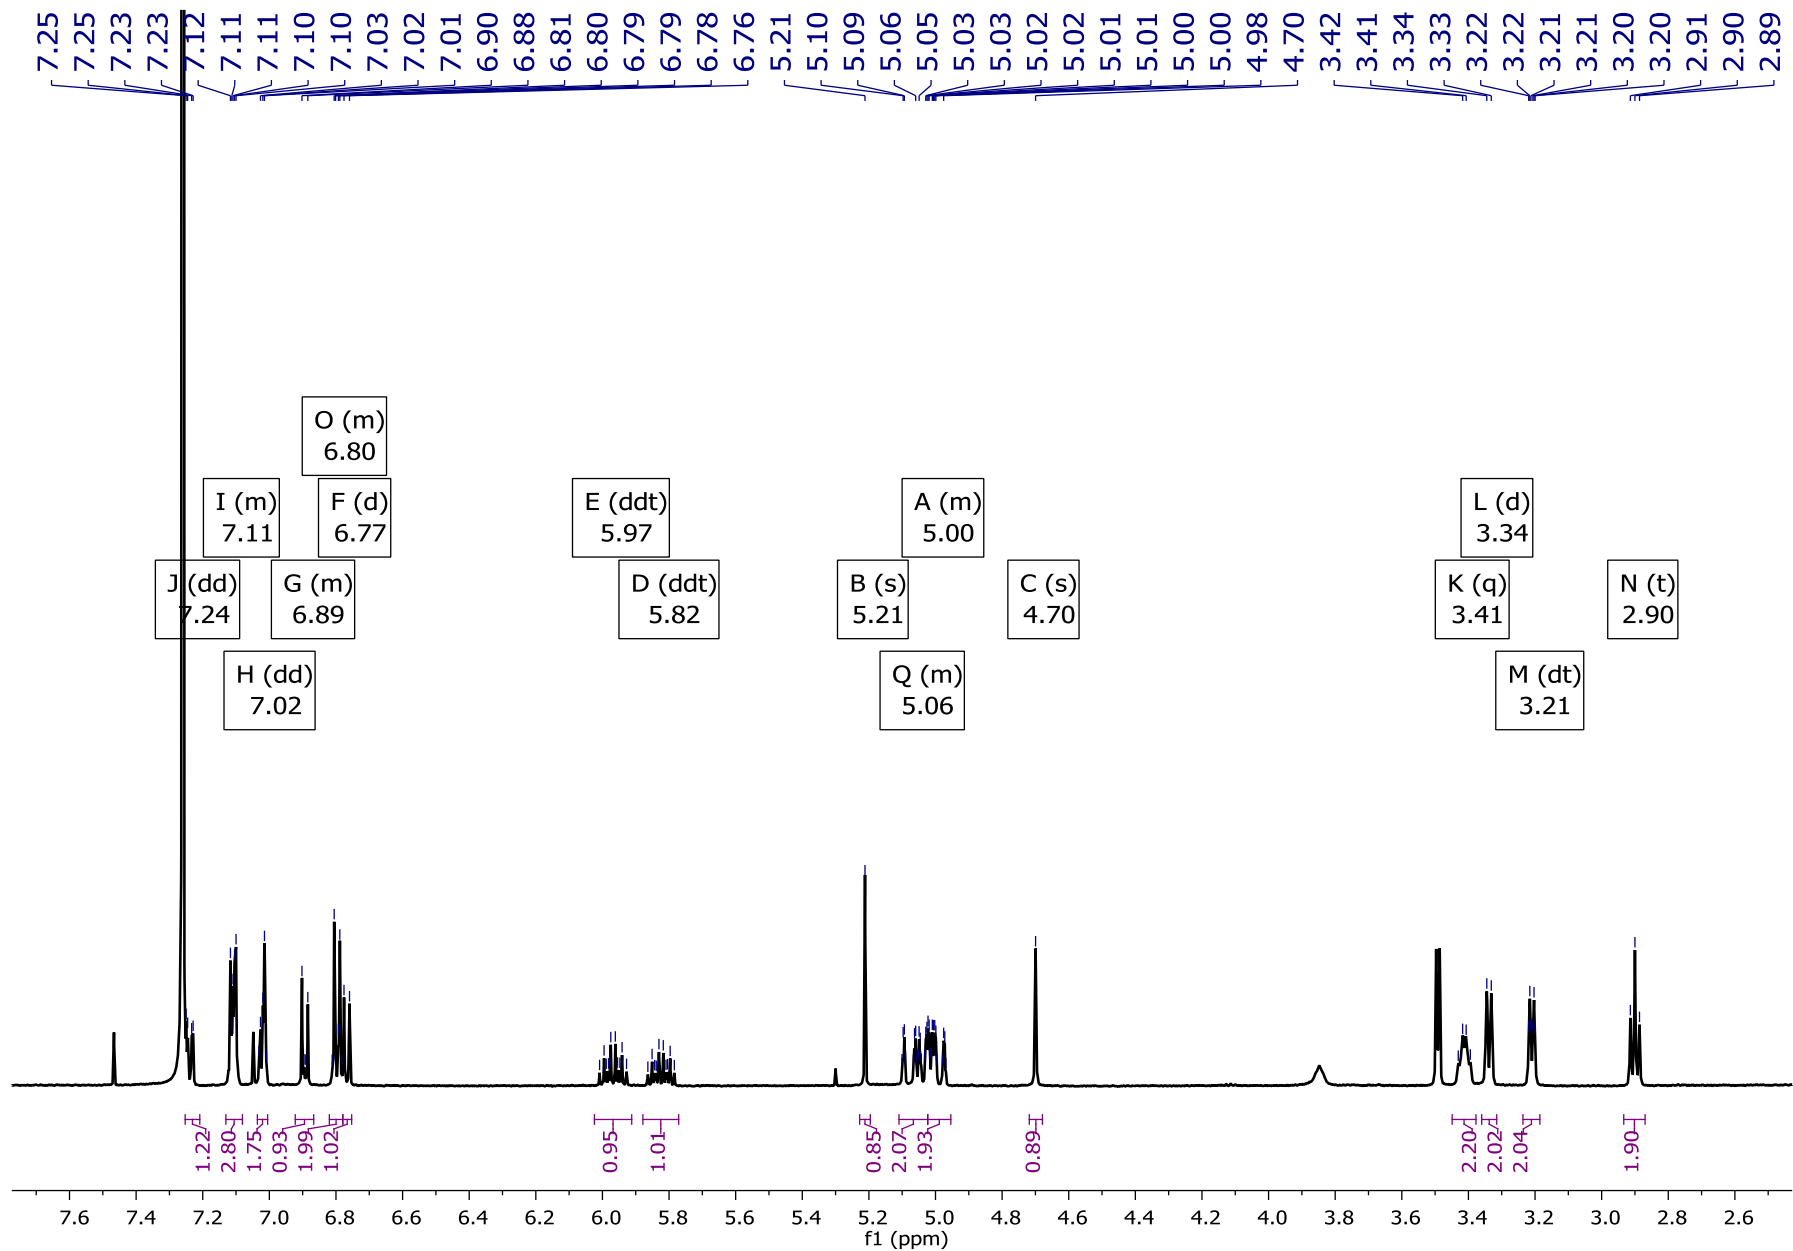

**Figure-S7:** <sup>1</sup>H-NMR spectrum (500 MHz, CDCl<sub>3</sub>) of compound **2**

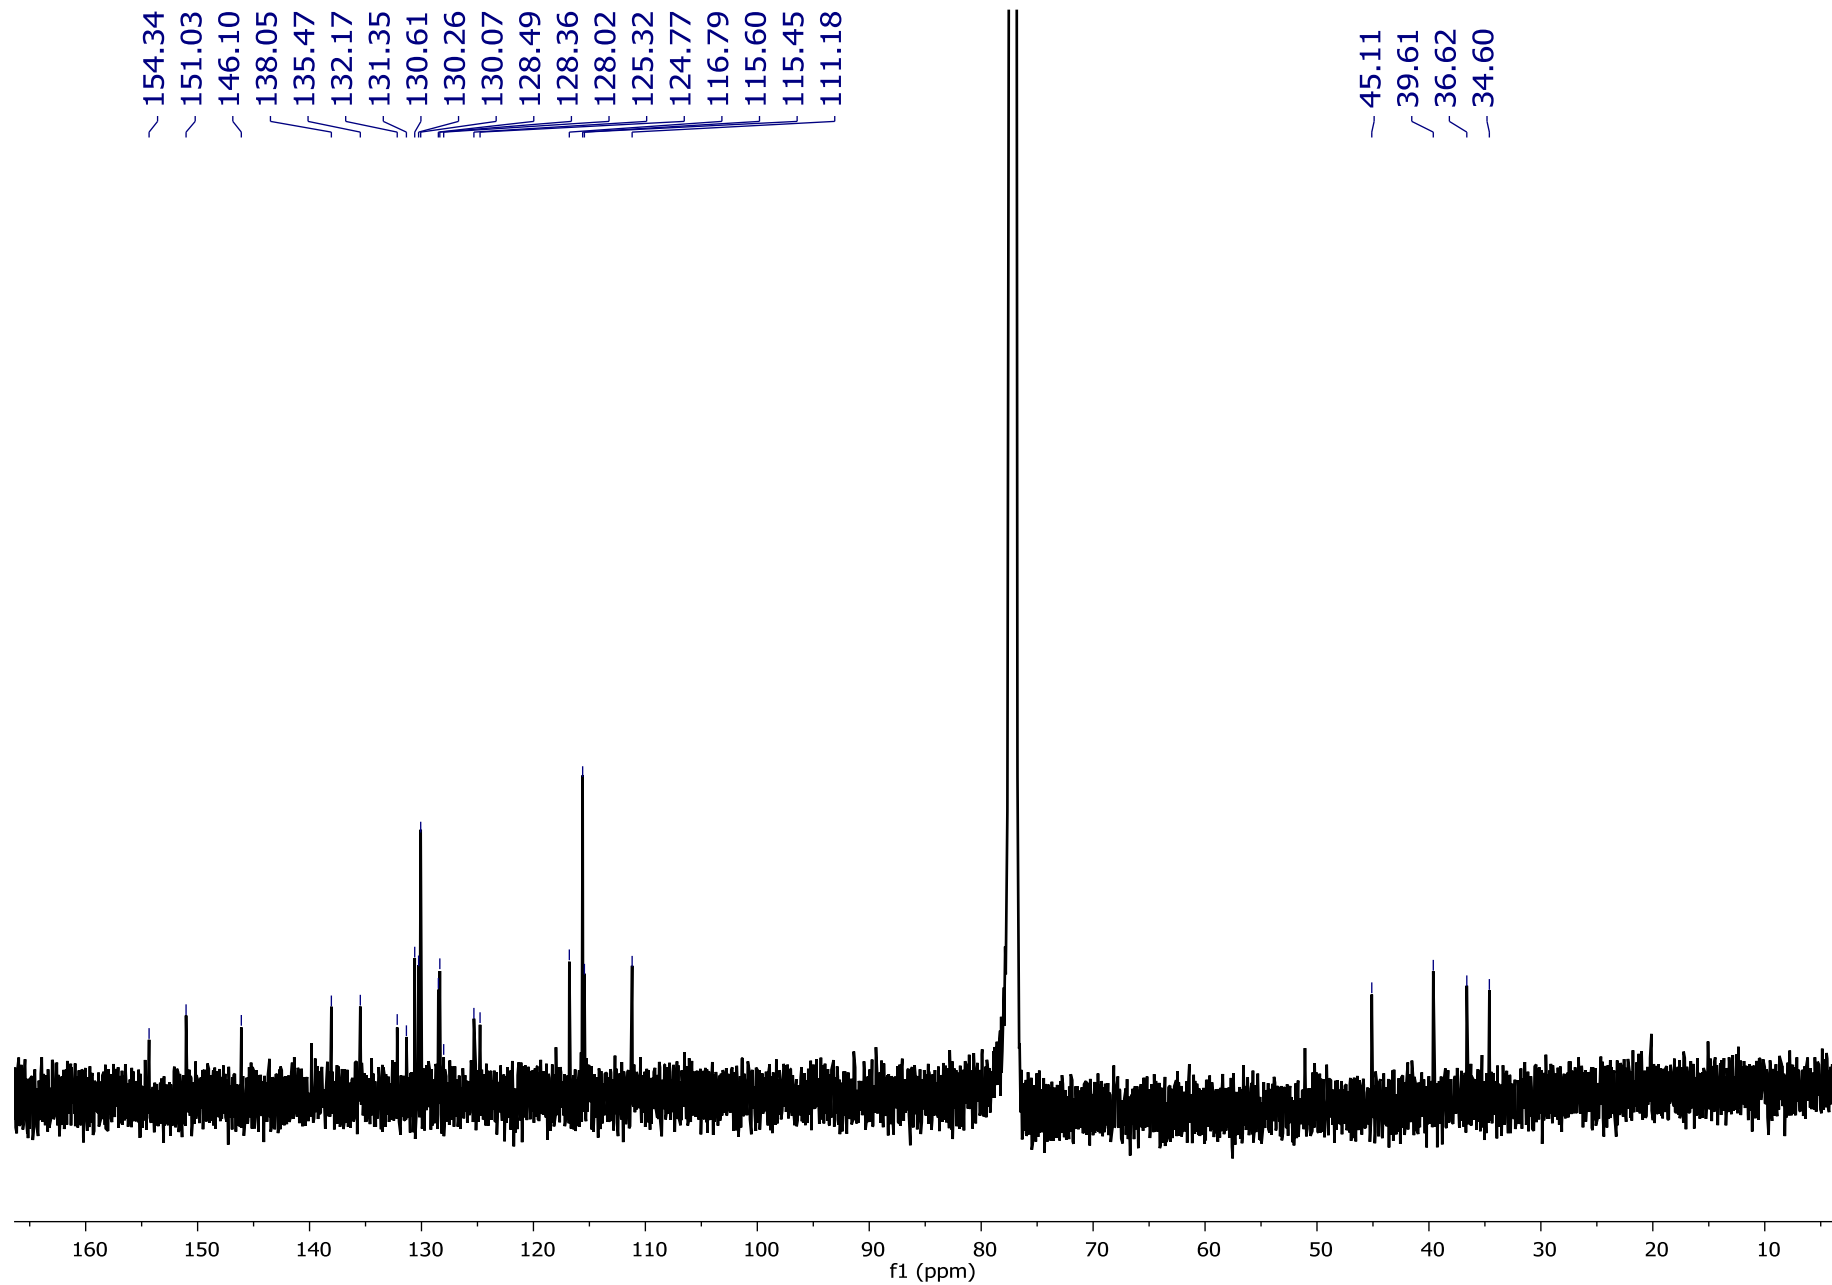

**Figure-S8:**  $^{13}\text{C}$ -NMR spectrum (125 MHz,  $\text{CDCl}_3$ ) of compound **2**

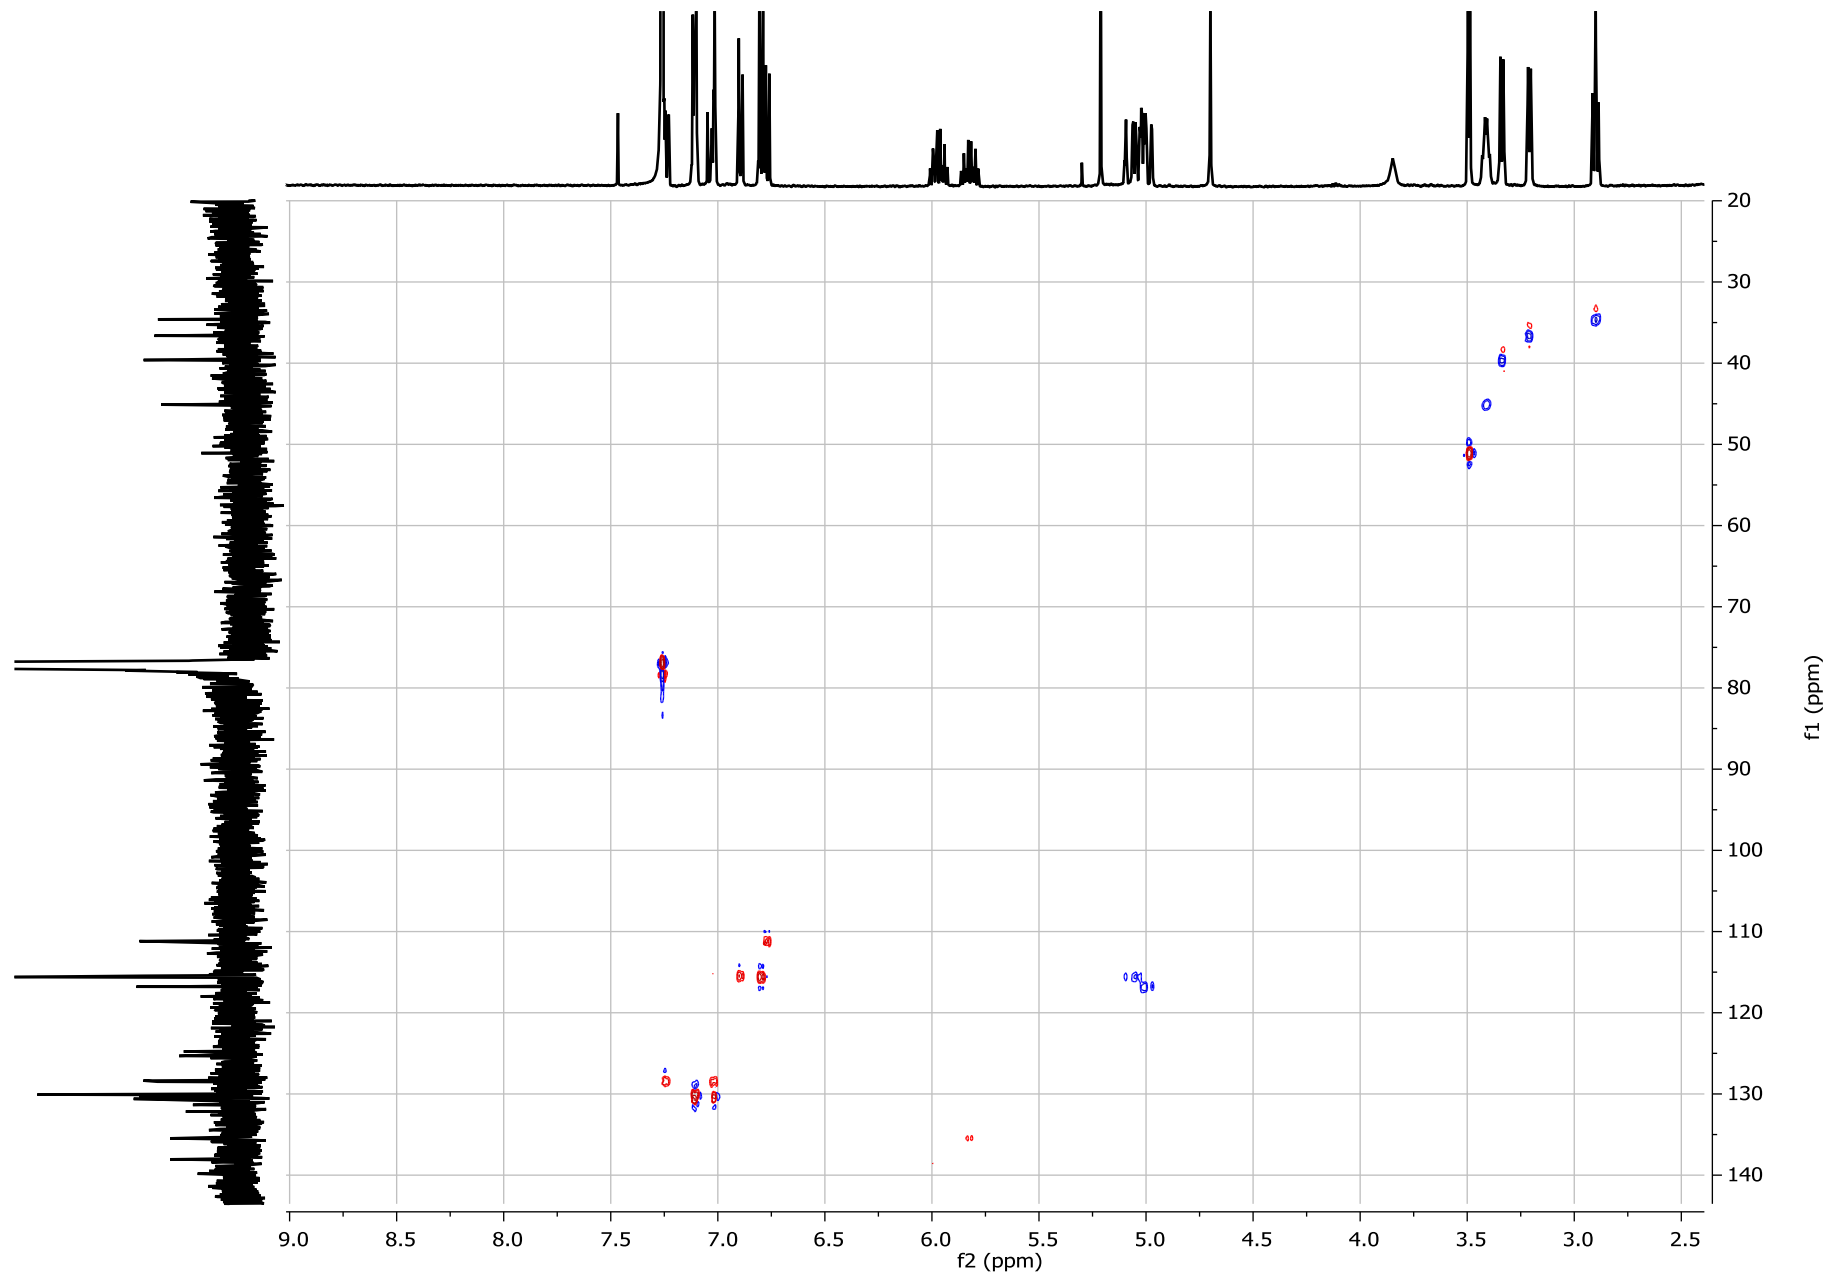

**Figure-S9:**  $^1\text{H}$ - $^{13}\text{C}$ -HSQC NMR spectrum of compound 2

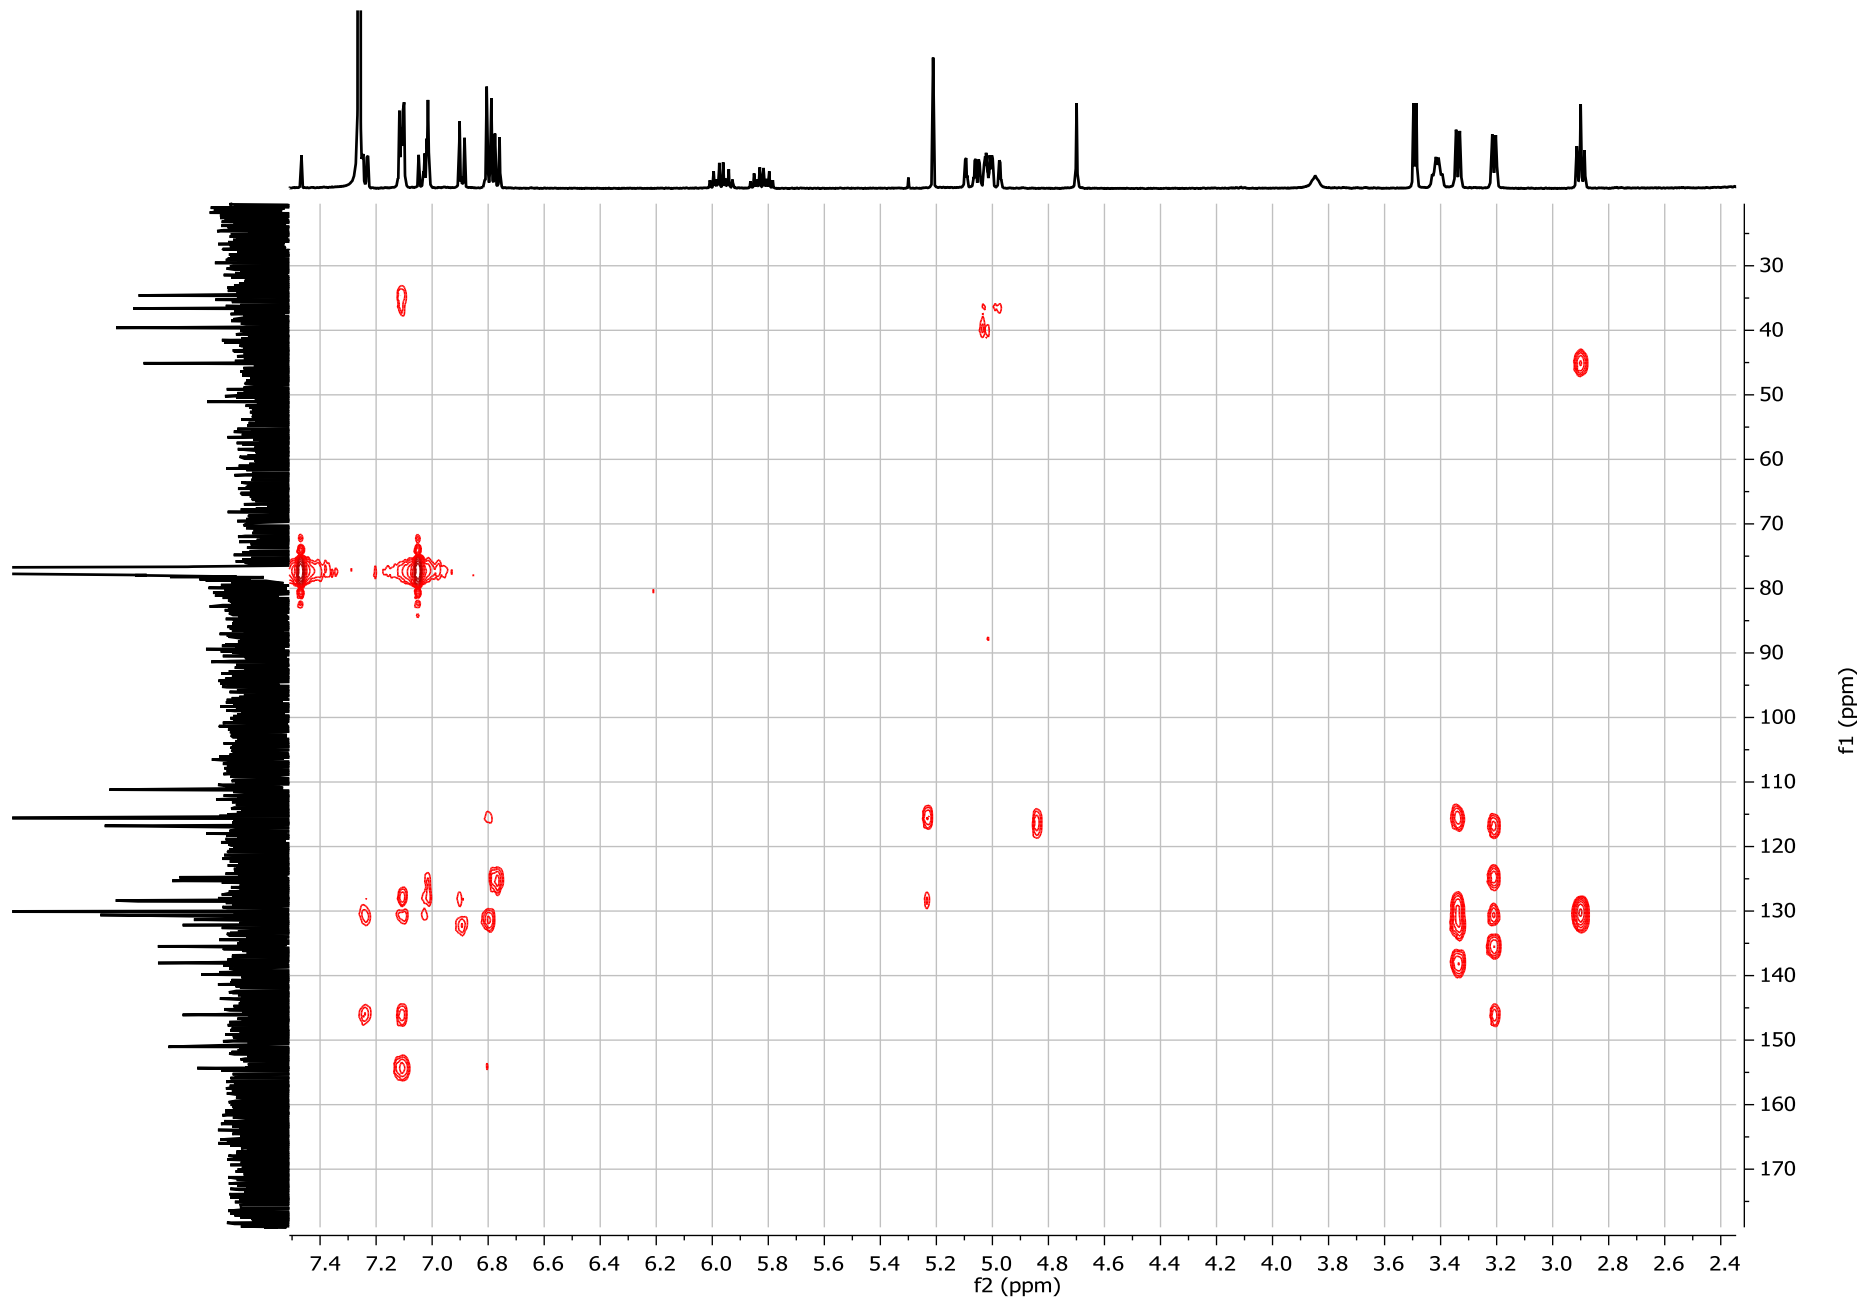

**Figure-S10:**  $^1\text{H}$ - $^{13}\text{C}$ -HMBC NMR spectrum of compound **2**

|               |                      |             |                     |                 |              |                        |                      |
|---------------|----------------------|-------------|---------------------|-----------------|--------------|------------------------|----------------------|
| Sample Name   | AL-7853-new          | Position    | P1-C5               | Instrument Name | Instrument 1 | User Name              |                      |
| Inj Vol       | 2                    | InjPosition |                     | SampleType      | Sample       | IRM Calibration Status | Some Ions Missed     |
| Data Filename | AL-7853-new_esineg_u | ACQ Method  | Dual_esineg_union.m | Comment         |              | 431820 Acquired Time   | 7/6/2016 10:05:15 AM |

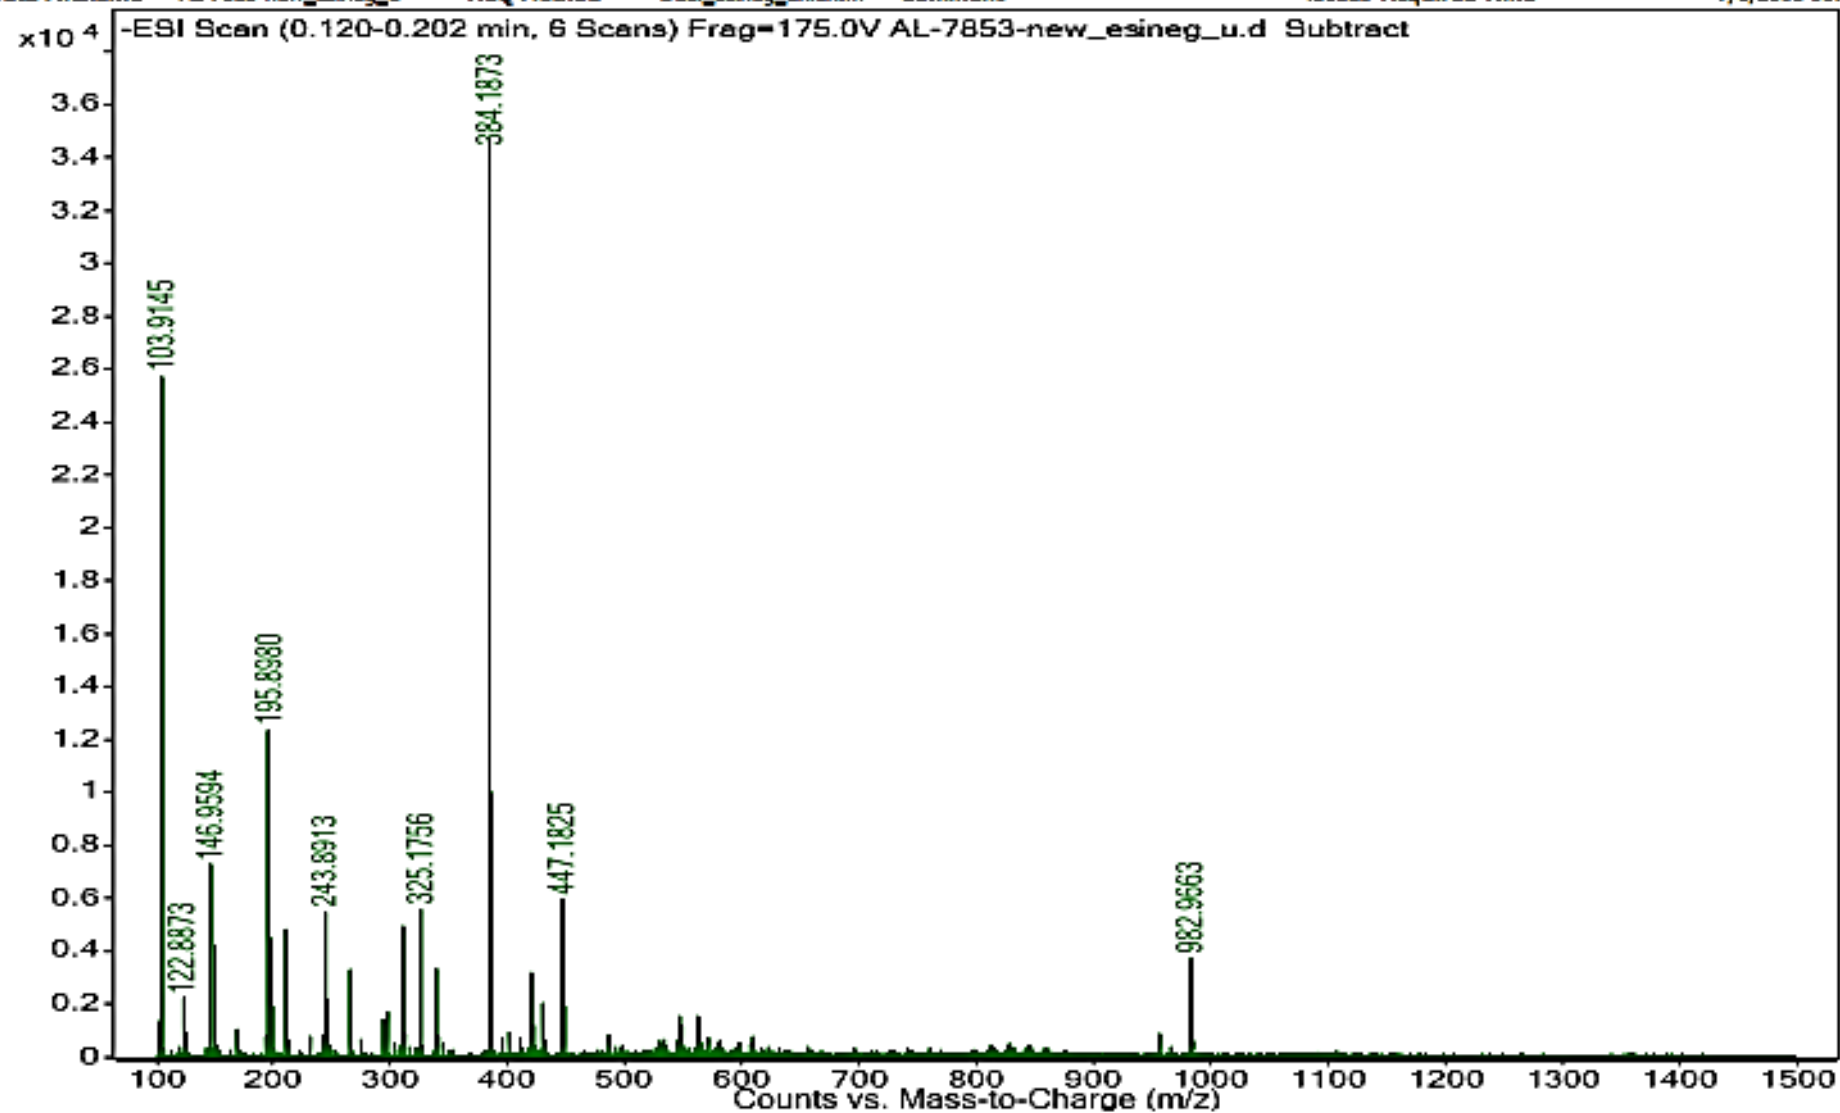

Figure-S11: HR-ESIMS spectrum of compound 2 in negative mode

|               |                      |             |                  |                 |              |                        |                      |
|---------------|----------------------|-------------|------------------|-----------------|--------------|------------------------|----------------------|
| Sample Name   | AL-7853-new          | Position    | P1-C5            | Instrument Name | Instrument 1 | User Name              |                      |
| Inj Vol       | 2                    | InjPosition |                  | SampleType      | Sample       | IRM Calibration Status | Success              |
| Data Filename | AL-7853-new_esipos_u | ACQ Method  | Dual_esl_union.m | Comment         | 431820       | Acquired Time          | 7/6/2016 10:10:02 AM |

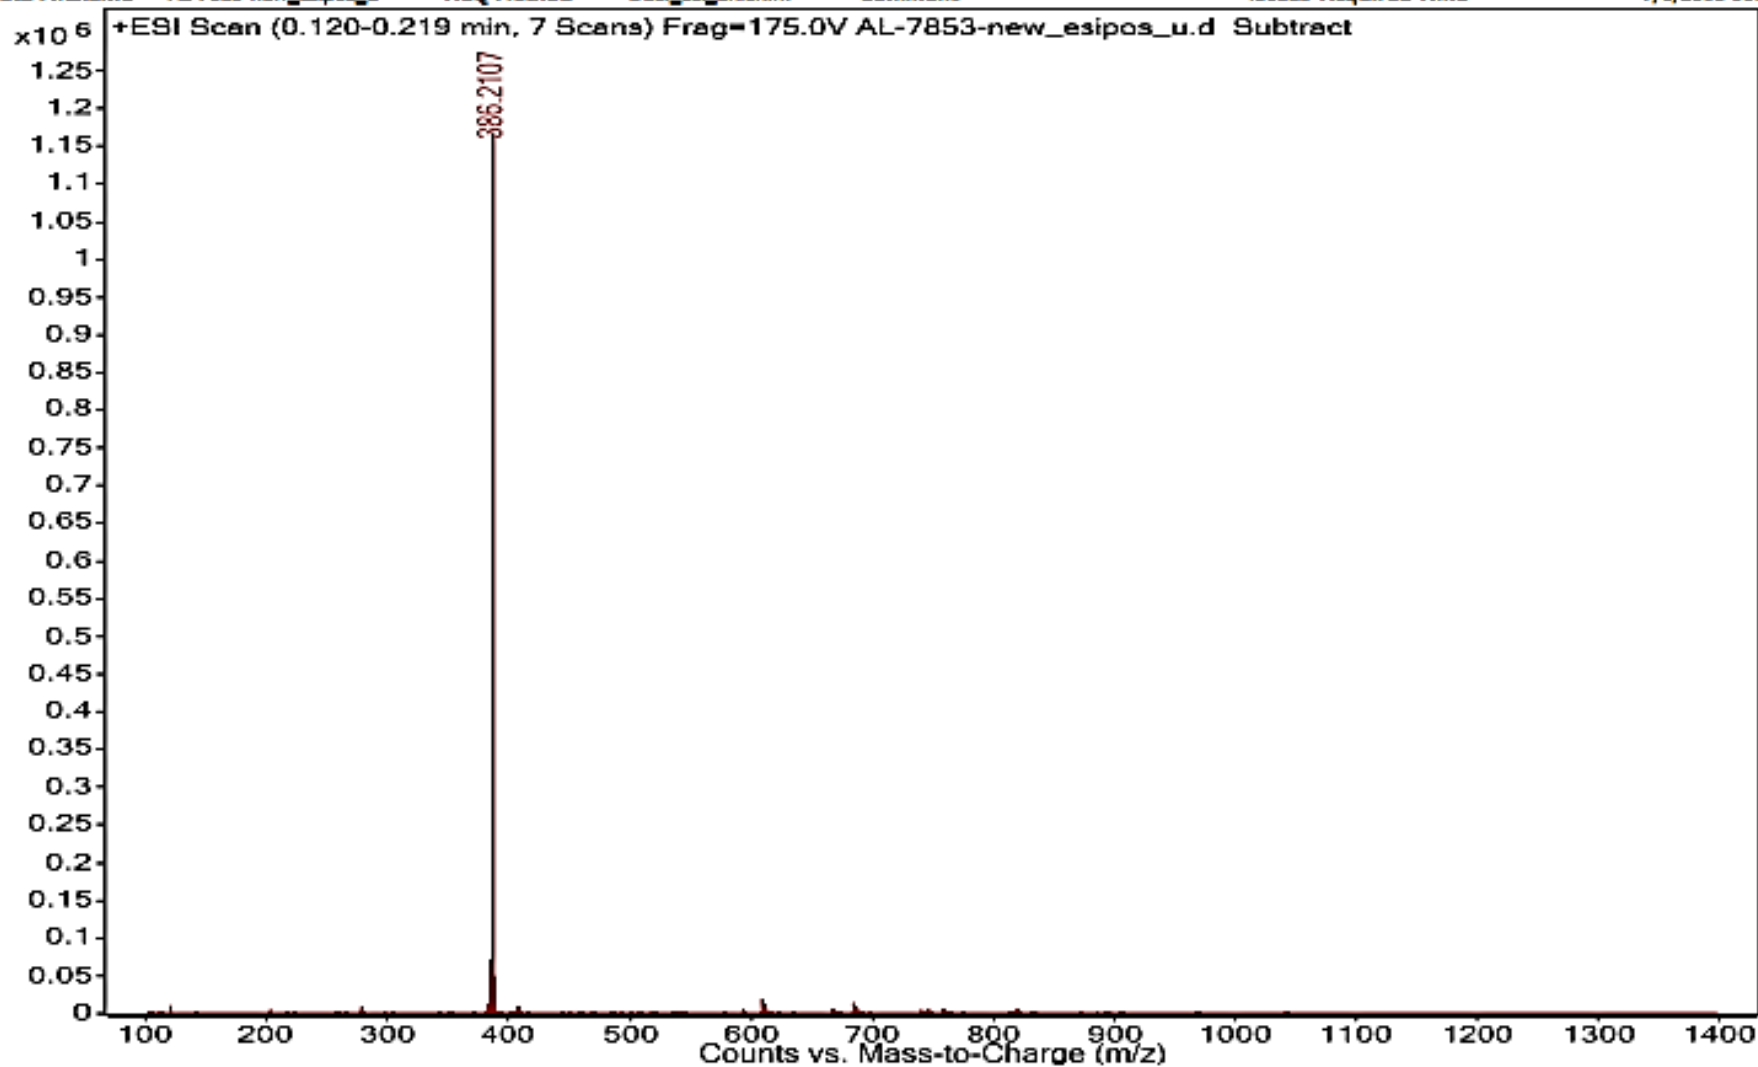

Figure-S12: HR-ESIMS spectrum in of compound 2 in positive mode

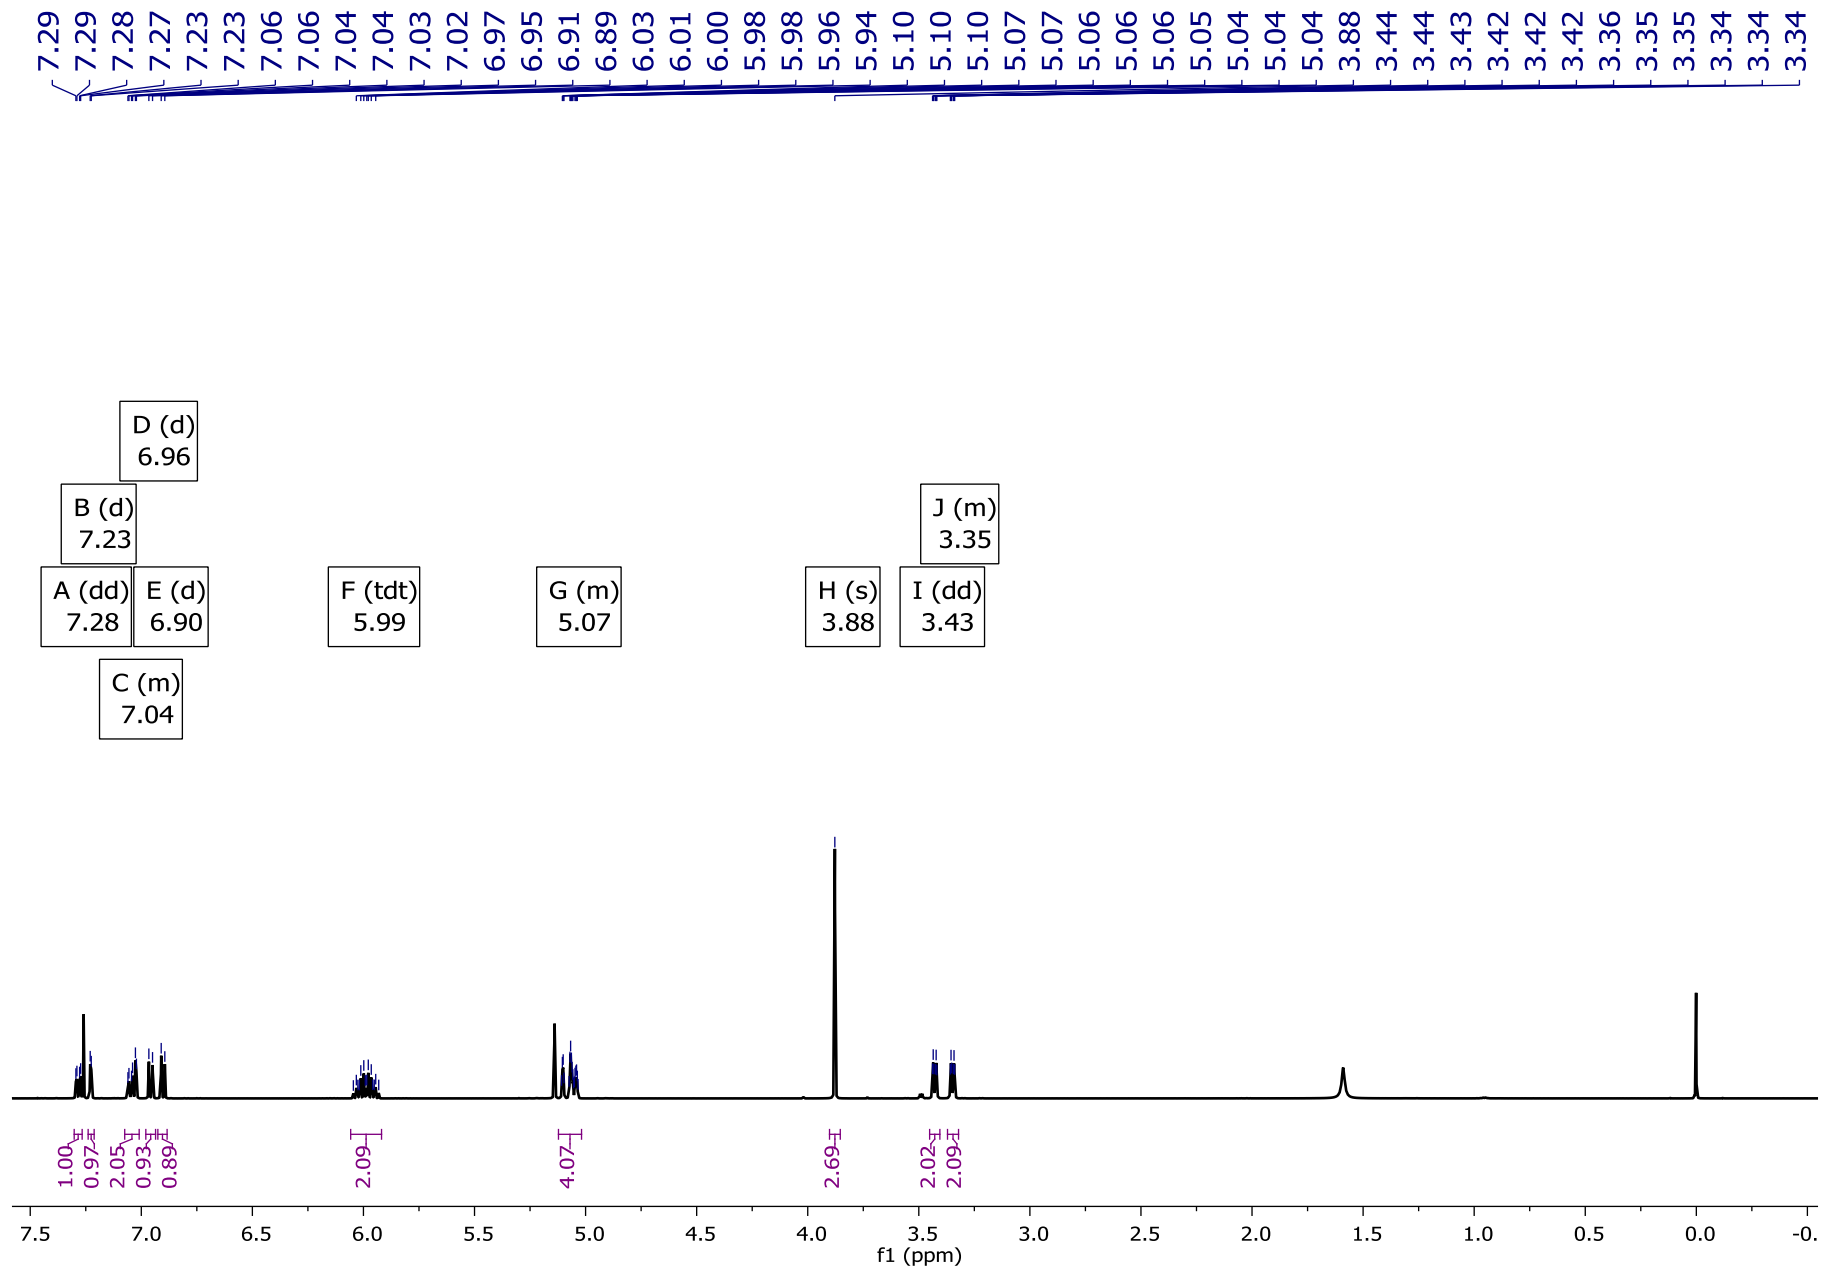

**Figure-S13:** <sup>1</sup>H-NMR spectrum (500 MHz, CDCl<sub>3</sub>) of compound **3**

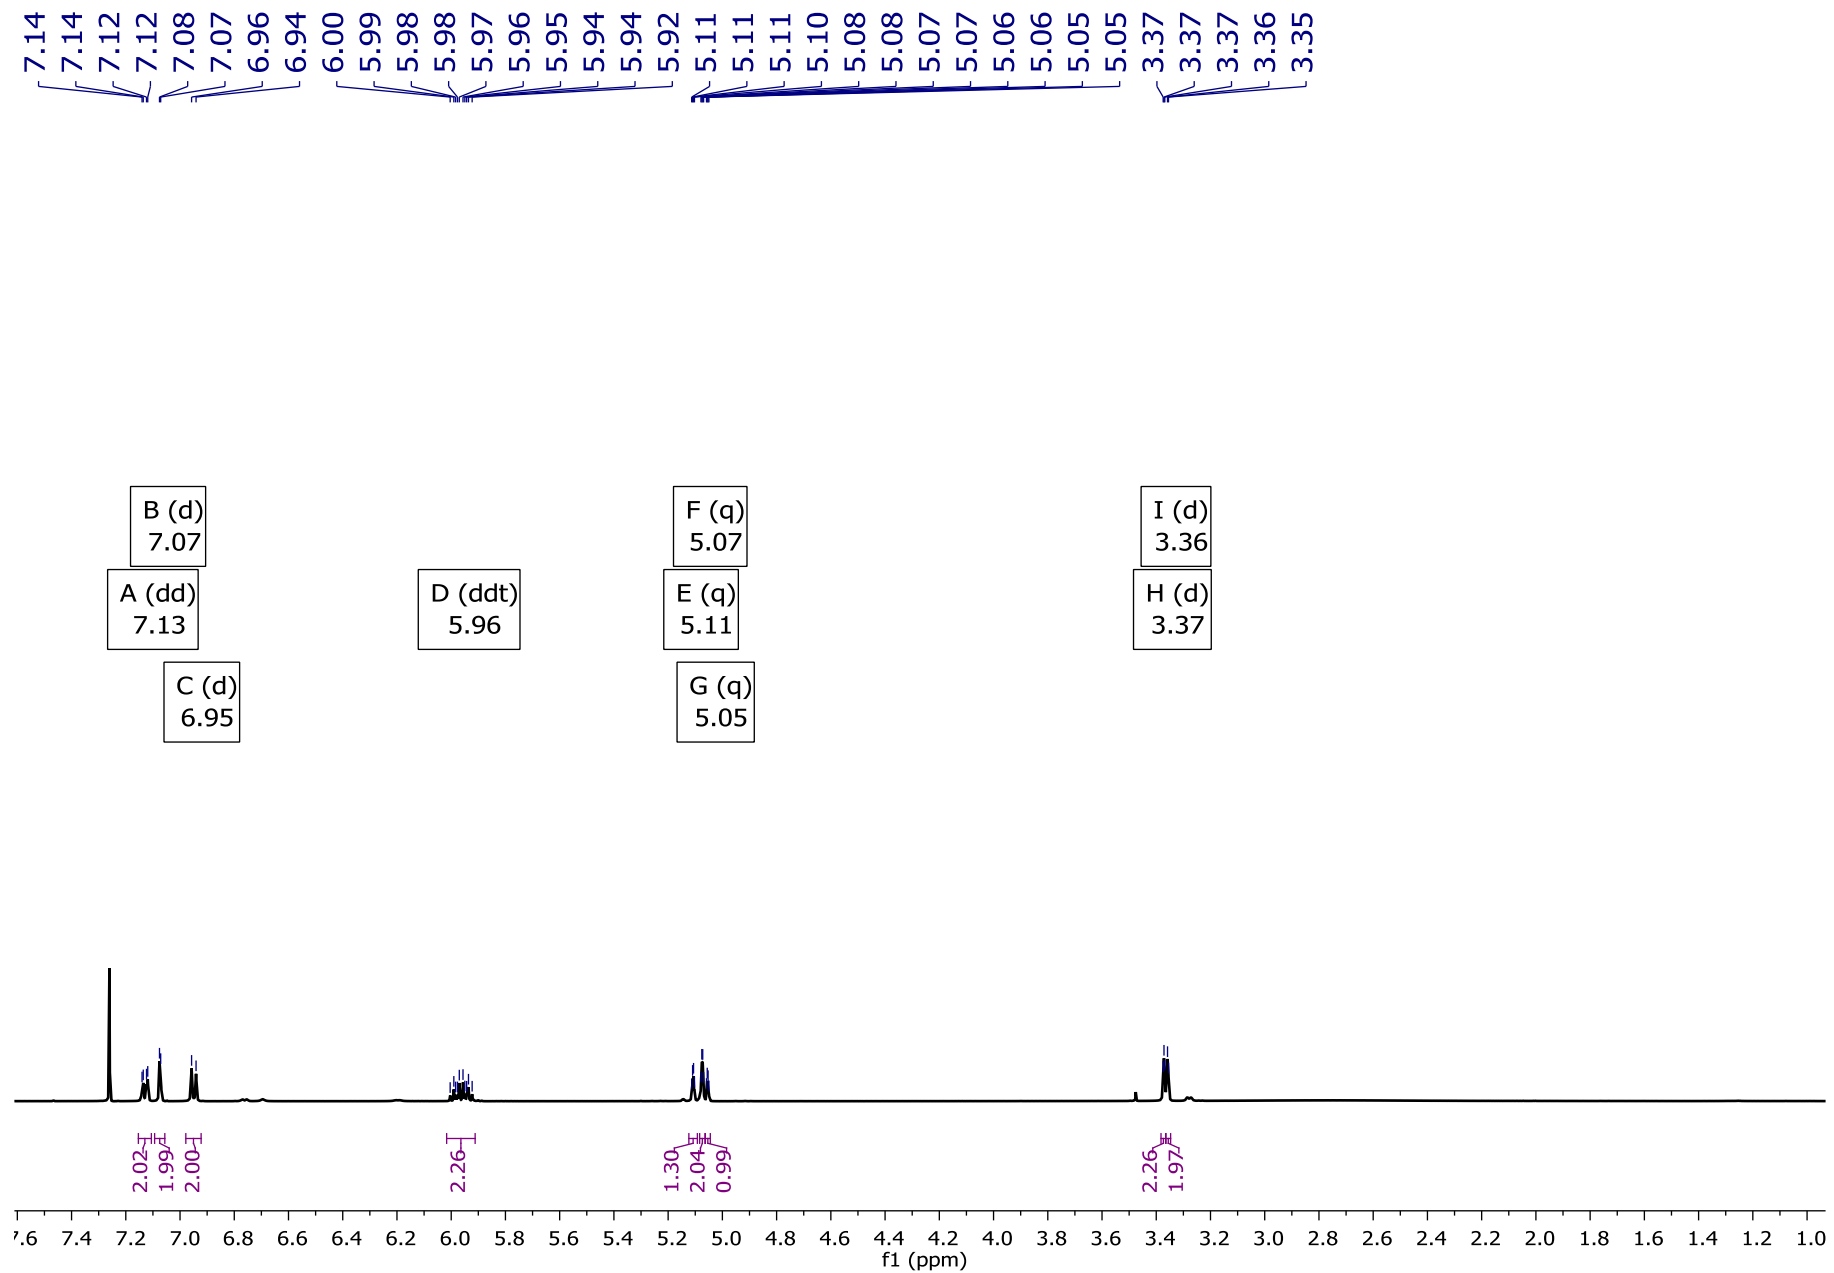

**Figure-S14:** <sup>1</sup>H-NMR spectrum (500 MHz, CDCl<sub>3</sub>) of compound **4**



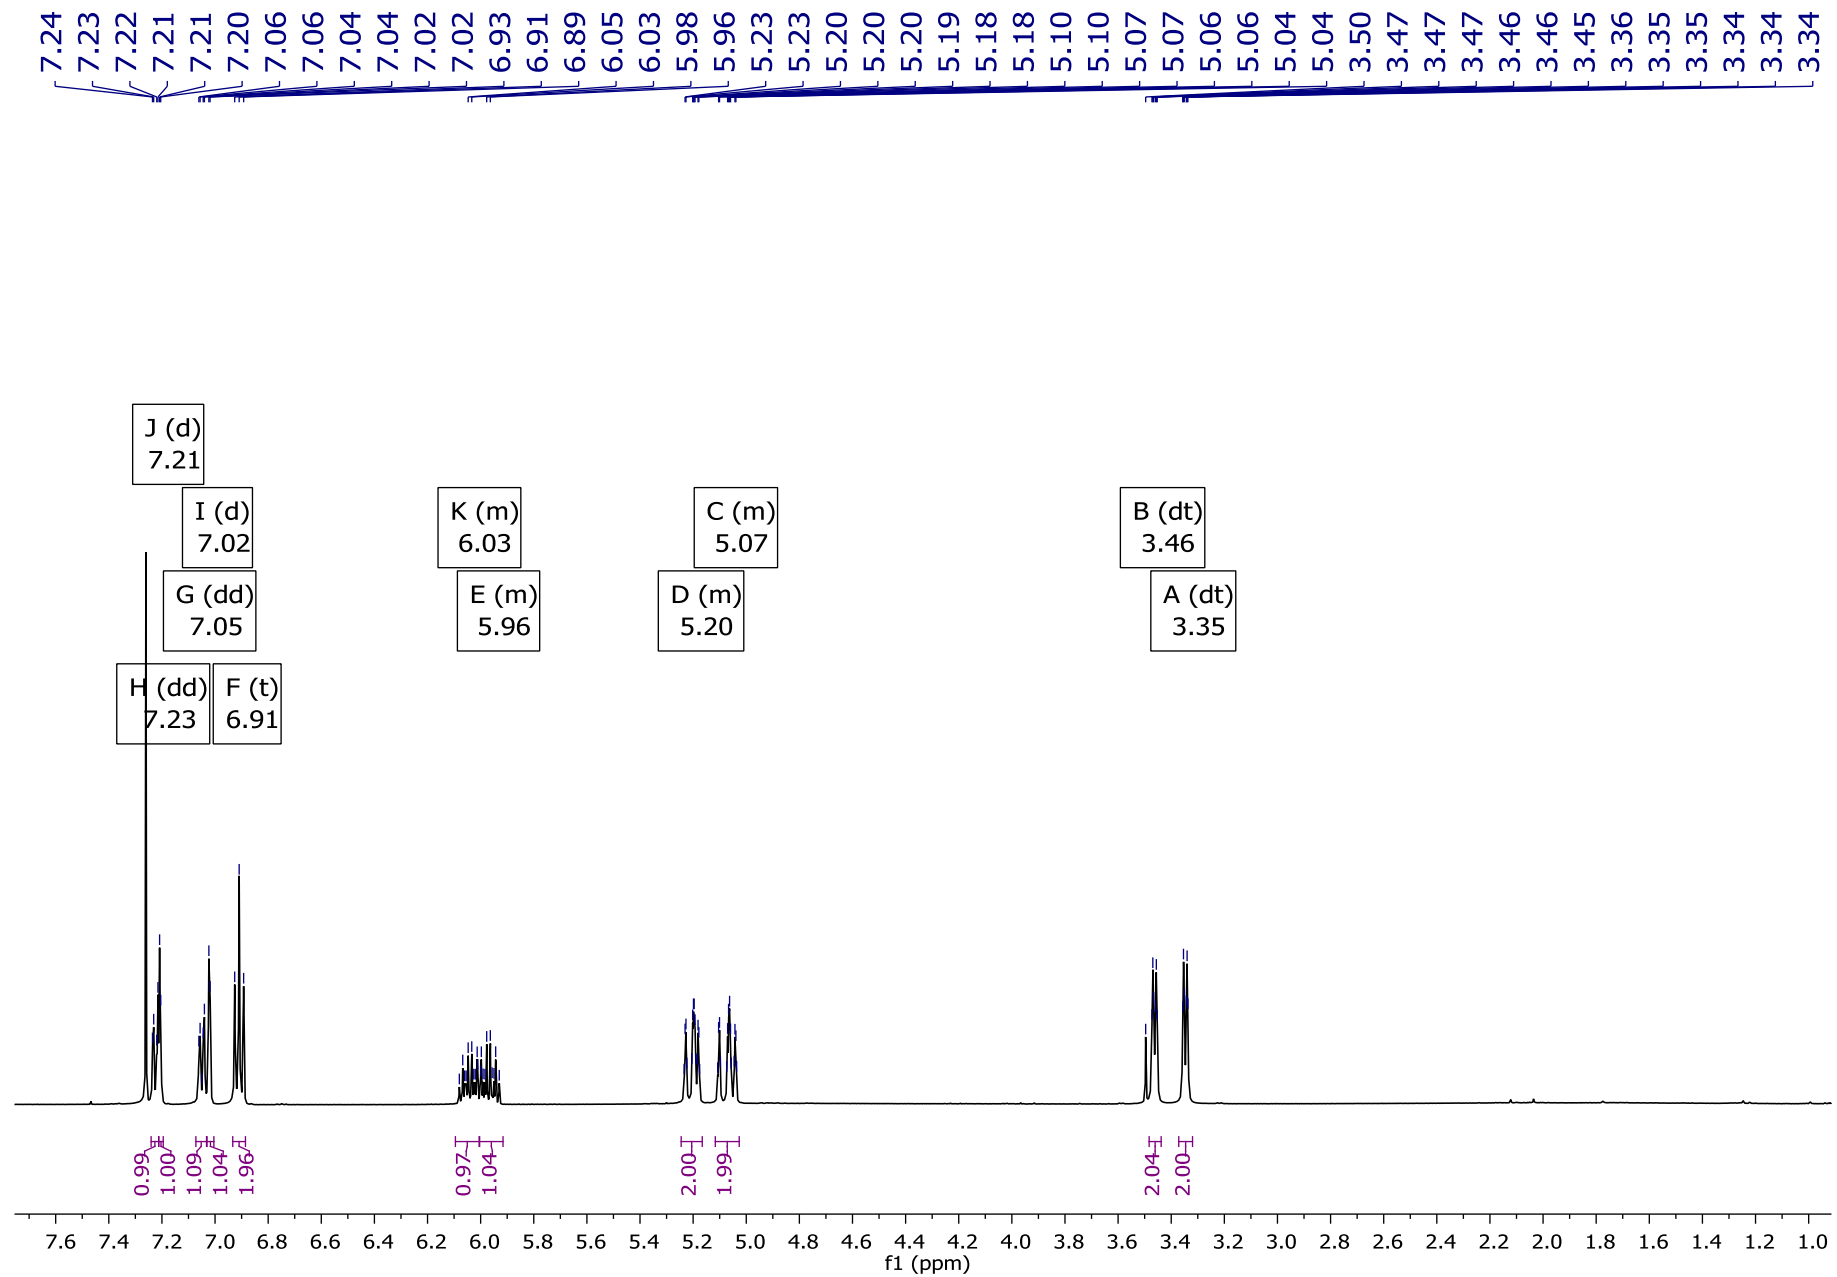

**Figure-S15:** <sup>1</sup>H-NMR spectrum (500 MHz, CDCl<sub>3</sub>) of compound **5**

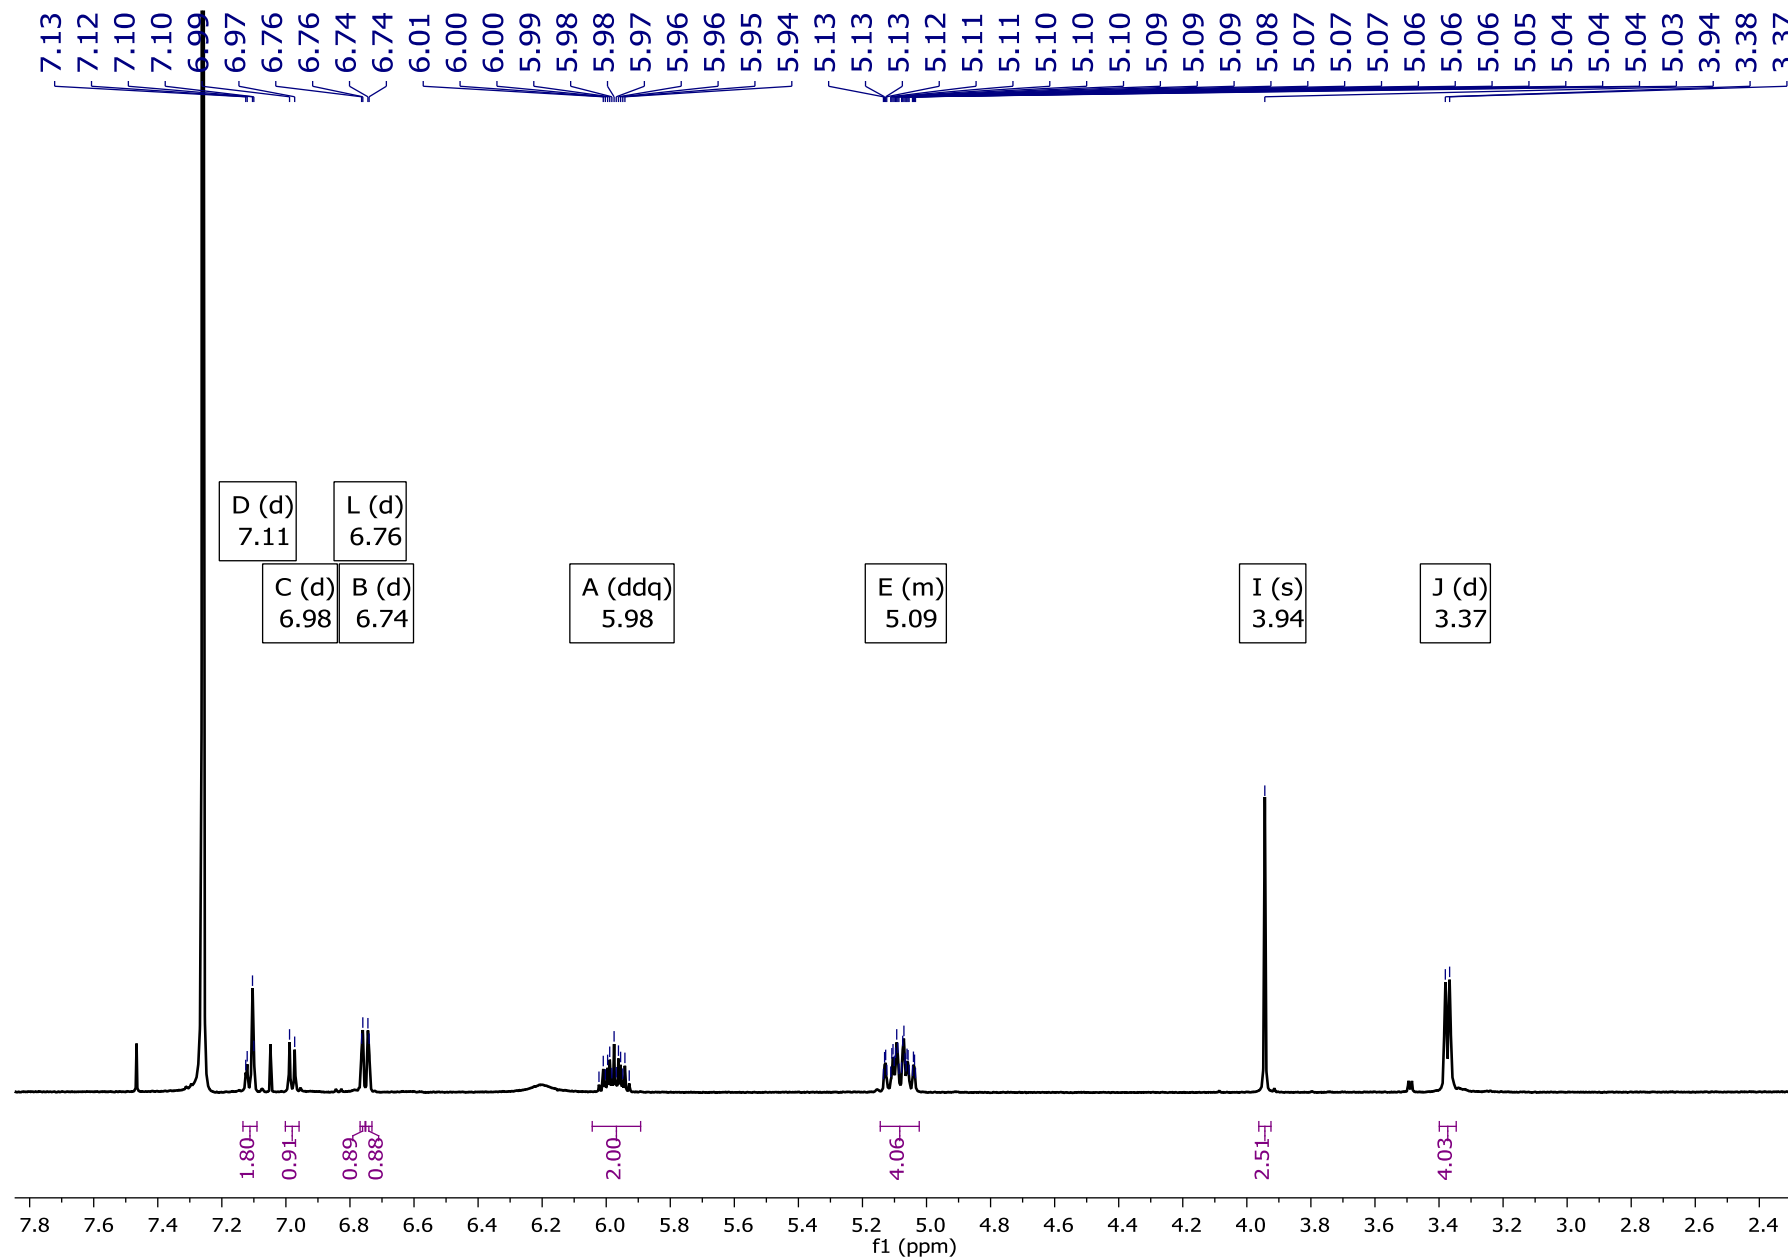

**Figure-S16:** <sup>1</sup>H-NMR spectrum (500 MHz, CDCl<sub>3</sub>) of compound 6

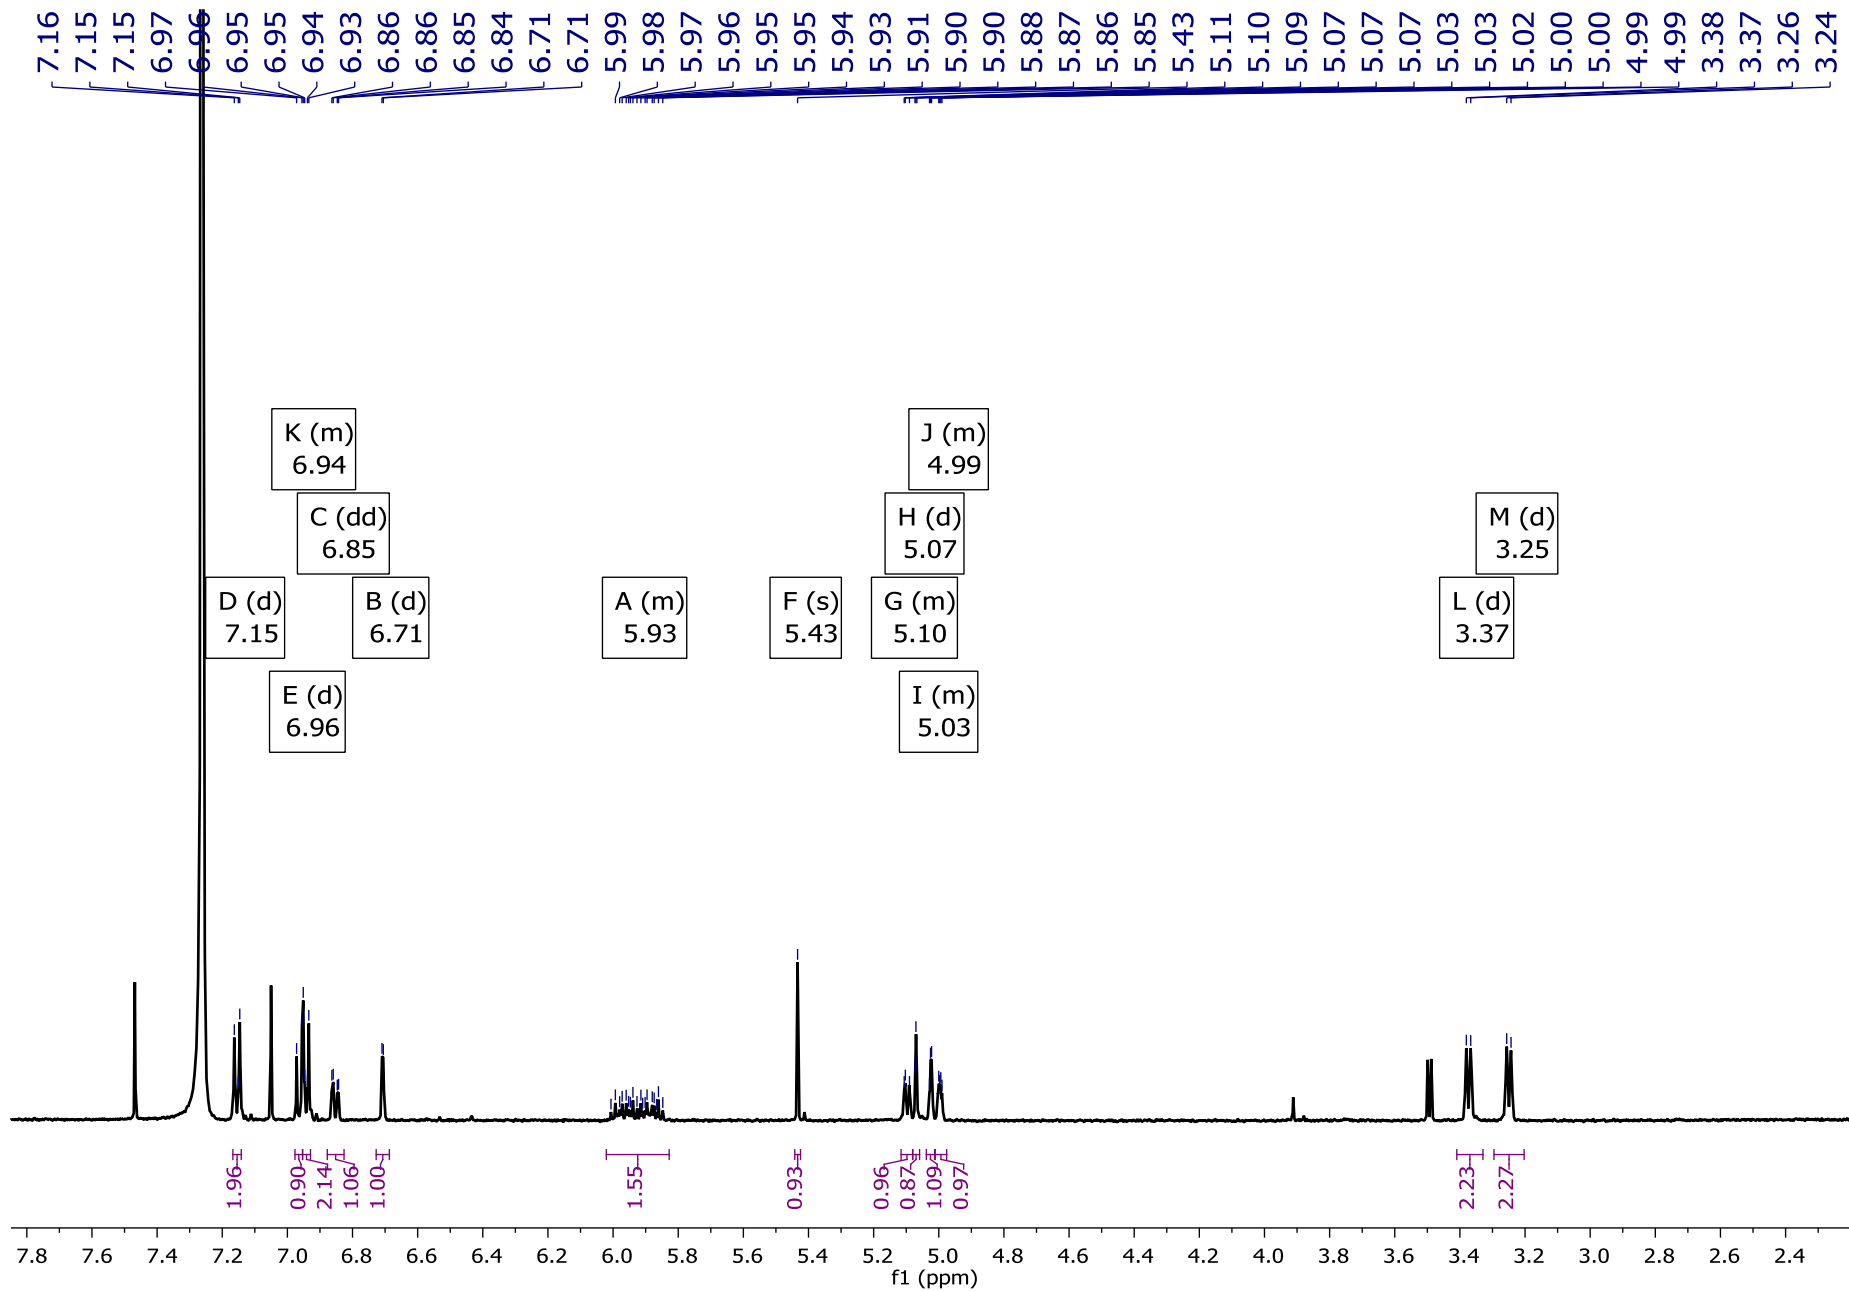

**Figure-S17:** <sup>1</sup>H-NMR spectrum (500 MHz, CDCl<sub>3</sub>) of compound 7

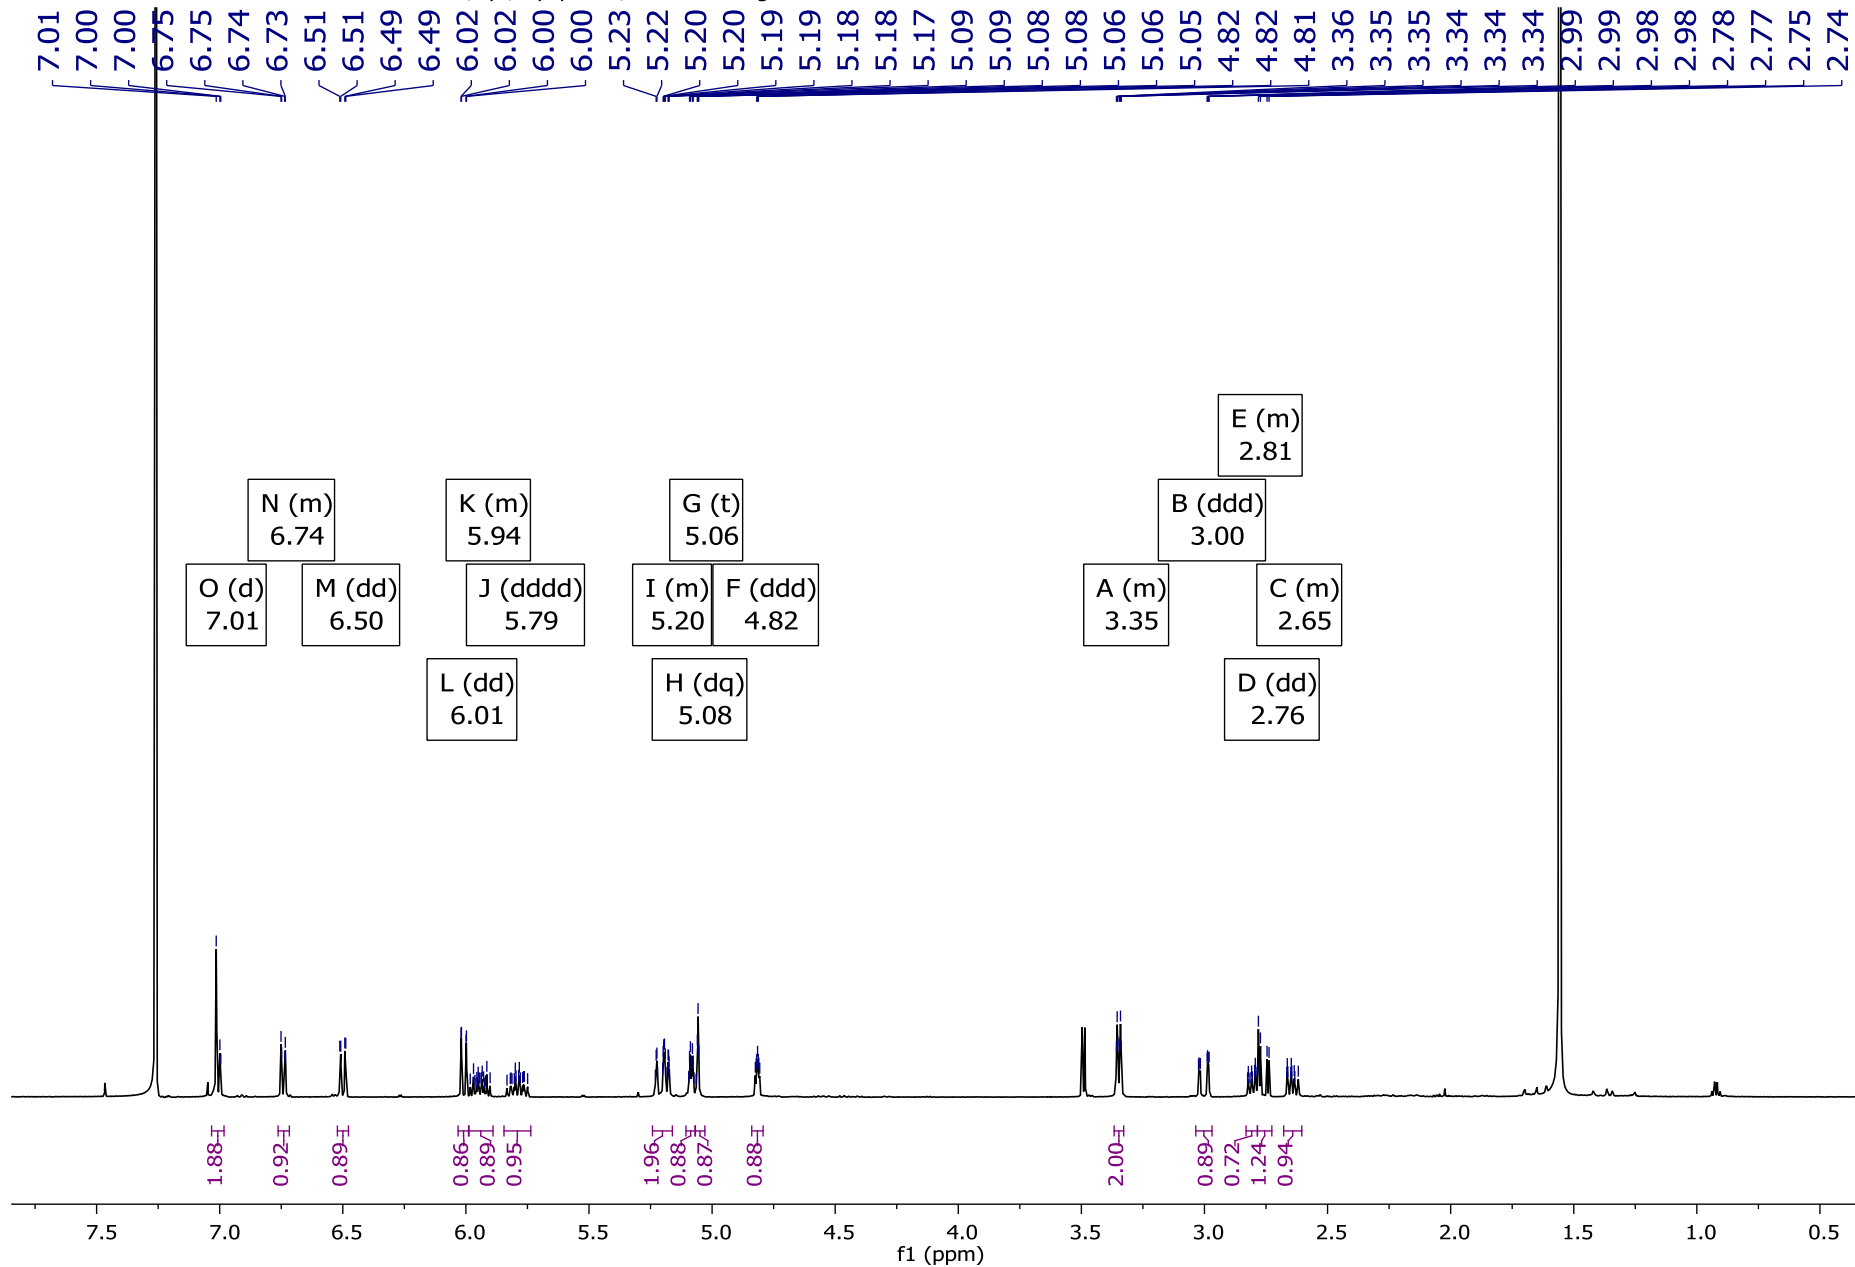

**Figure-S18:** <sup>1</sup>H-NMR spectrum (500 MHz, CDCl<sub>3</sub>) of compound **8**
